# Supplementary material for: N-Heterocyclic carbene-catalyzed cascade annulation reaction of o-vinylarylaldehydes with nitrosoarenes: one-step assembly of functionalized 2,3-benzoxazin-4-ones
Source: Royal Society of Chemistry journal article supplement (doi:10.1039/c2ob25137j), 2012-01-01

## Electronic Supplementary Information

# N-Heterocyclic Carbene-Catalyzed Cascade Annulation Reaction of *o*-Vinylarylaldehydes with Nitrosoarenes: One-Step Assembly of Functionalized 2,3-Benzoxazin-4-ones

*Zhong-Xin Sun and Ying Cheng\**

College of Chemistry, Beijing Normal University, Beijing, 100875, China.

ycheng2@bnu.edu.cn

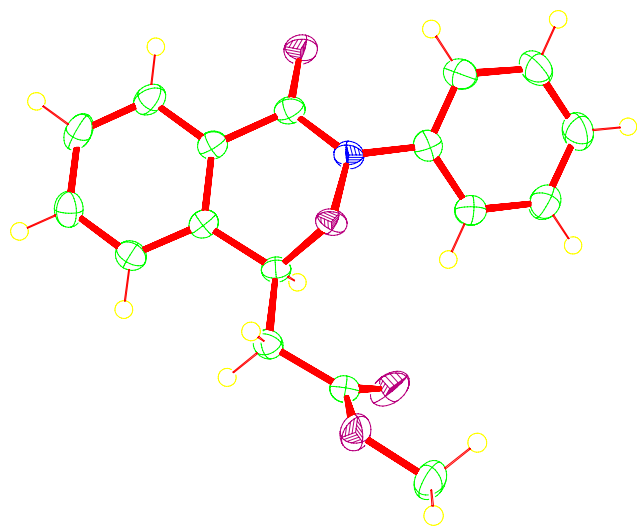

Figure S1. ORTEP drawing of X-ray structure of **4a**.

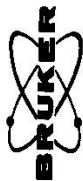

NAME SZX13-13  
EXPNO 1  
PROCNO 1  
Date\_ 20110318  
Time\_ 15.40  
INSTRUM spect  
PROBHD 5 mm PABBO BB-  
PULPROG zg30  
TD 65536  
SOLVENT CDCl3  
NS 16  
DS 2  
SWH 8223.685 Hz  
FIDRES 0.125483 Hz  
AQ 3.9846387 sec  
RG 203  
DW 60.800 usec  
DE 6.50 usec  
TE 296.7 K  
DL 1.00000000 sec  
TDO 1

===== CHANNEL f1 =====  
NUC1 1H  
P1 14.20 usec  
PL1 -1.00 dB  
FLLW 13.18669796 W  
SFO1 400.1724712 MHz  
SI 32768  
SF 400.1700034 MHz  
WDW EM  
SSB 0  
LB 0.30 Hz  
GB 0  
PC 1.00

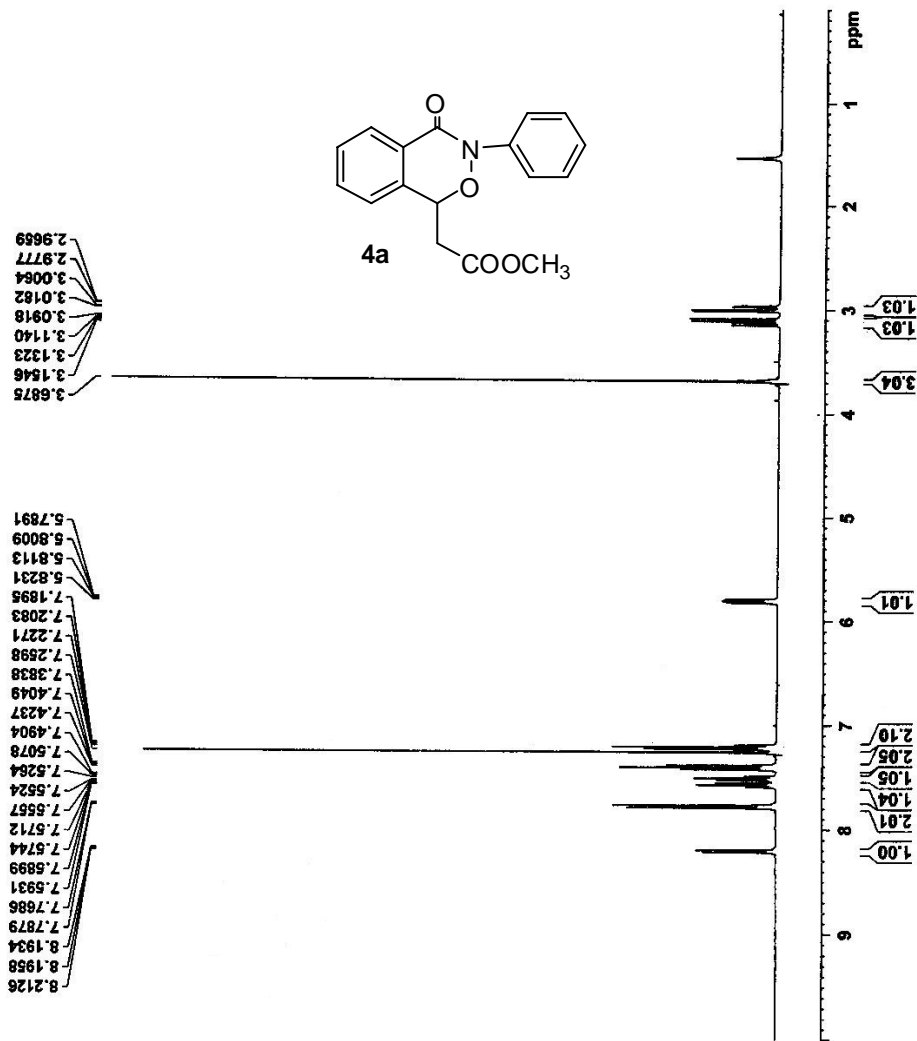

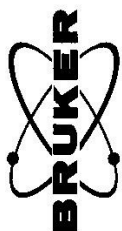

```

NAME          SX13-13-13
EXPNO         1
PROCNO        1
Date_         20110319
Time          17.32
INSTRUM       spect
PROBHD        5 mm PABBO BB-
PULPROG       zgpg30
TD            65536
SOLVENT       CDCl3
NS            1097
DS            4
SWH           24038.463 Hz
FIDRES        0.365798 Hz
AQ            1.3631988 sec
RG            203
DW            20.800 usec
DE            6.50 usec
TE            297.7 K
D1            2.0000000 sec
D11           0.0300000 sec
TD0           1
===== CHANNEL f1 =====
NUC1          13C
P1            8.70 usec
PL1          -2.00 dB
PL1W         57.32743073 W
SFO1         100.6282888 MHz
===== CHANNEL f2 =====
CFDPRG2       waitz16
NUC2          1H
PCPD2         80.00 usec
ELZ          1.00 dB
PL2          14.02 dB
PL3          14.02 dB
PL12W        13.186669706 W
PL12M        0.41508400 W
PL13W        0.37509048 W
SFO2         400.1716007 MHz
SI            32768
SF           100.62828256 MHz
WDW           EM
SSB           0
LB            1.00 Hz
GB            0
PC            1.40
    
```

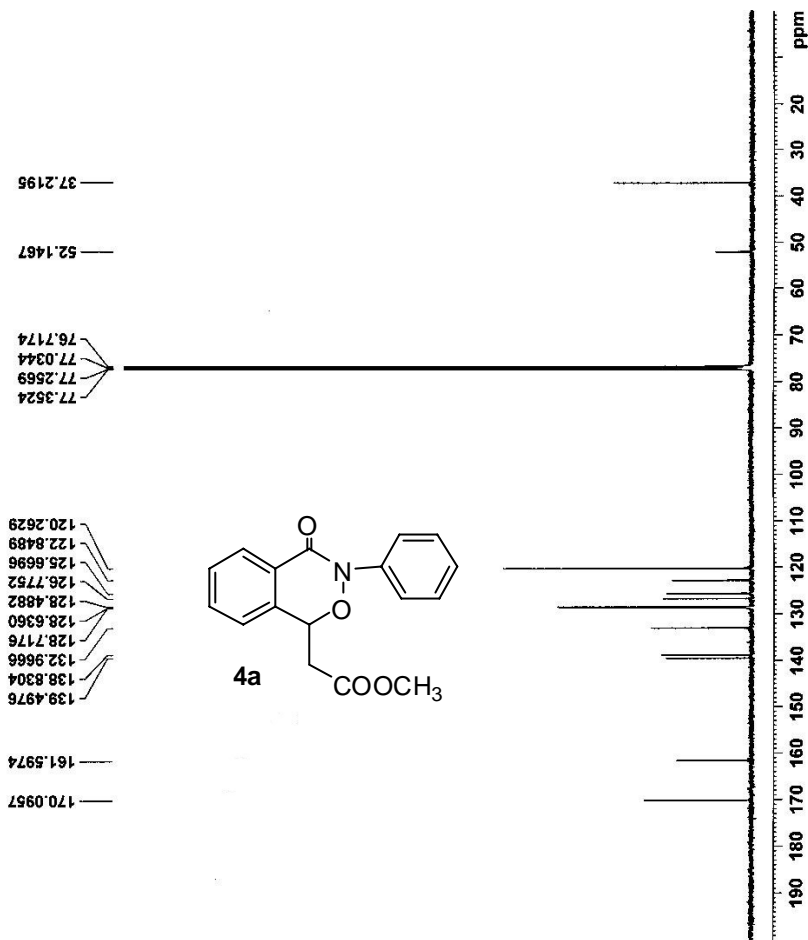

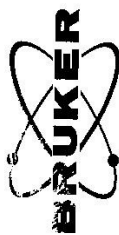

NAME SZX13-47  
EXPNO 1  
PROCNO 1  
Date\_ 20110608  
Time 16.46  
INSTRUM spect  
PROBHD 5 mm PABBO BB-  
PULPROG zg30  
ID 68536  
SOLVENT CDCl3  
NS 16  
DS 2  
SWH 8223.685 Hz  
FIDRES 0.125483 Hz  
AQ 3.9846387 sec  
RG 203  
DW 60.800 usec  
DE 6.50 usec  
TE 298.1 K  
D1 1.00000000 sec  
TDO 1

==== CHANNEL f1 =====  
Nuc1 1H  
P1 14.20 usec  
PL1 -1.00 dB  
PL1W 13.18669796 W  
SF01 400.1724712 MHz  
SI 32768  
SF 400.1700042 MHz  
EM 0  
WDW EM  
SSB 0  
LB 0.30 Hz  
GB 0  
PC 1.00

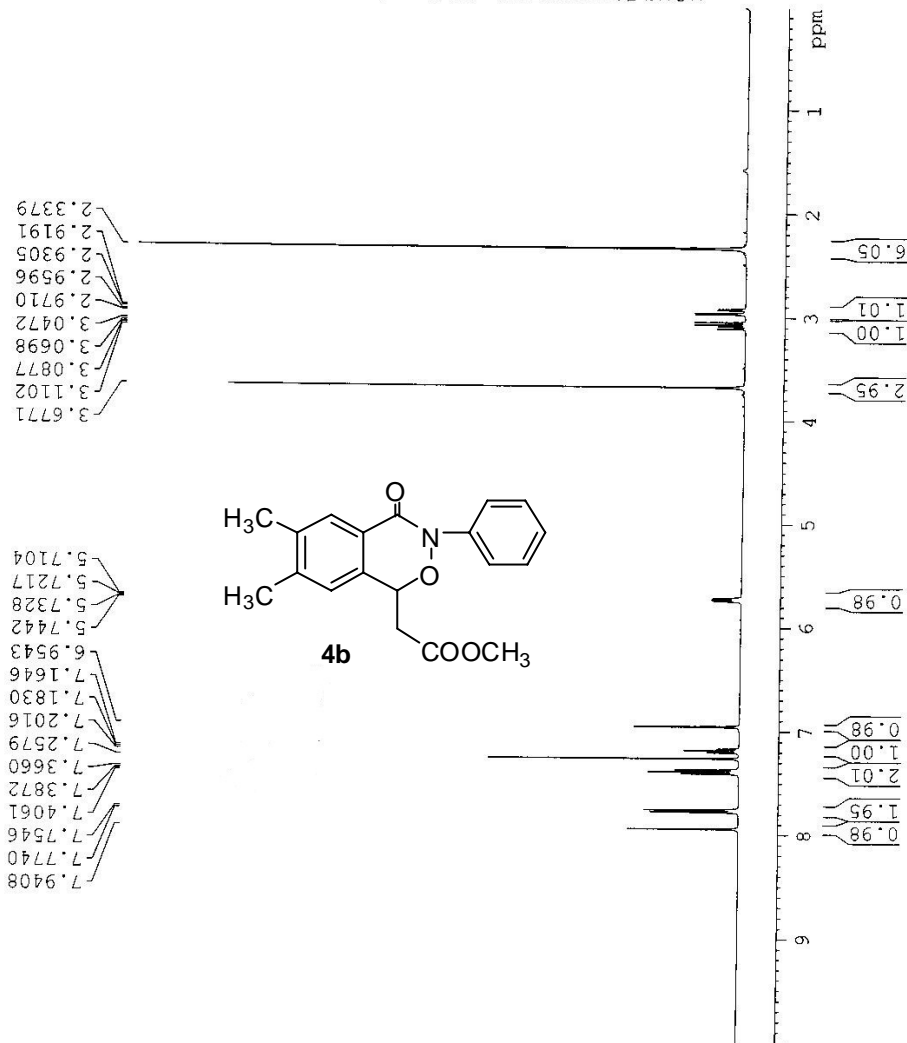

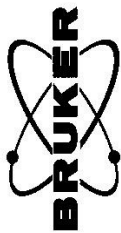

```

NAME          SZX13-47-C13
EXPNO         1
PROCNO        1
Date_         20110609
Time_         21.52
INSTRUM       spect
PROBHD        5 mm PABBO BB-
PULPROG       zgpg30
TD            65536
SOLVENT       CDCl3
NS            1070
DS            4
SWH           24038.461 Hz
FIDRES       0.366798 Hz
AQ           1.3631988 sec
RG           203
DW           20.800 usec
DE           6.50 usec
TE           300.0 K
D1           2.0000000 sec
D11          0.0300000 sec
TD0          1

===== CHANNEL f1 =====
NUC1          13C
P1            8.70 usec
PL1          -2.00 dB
FLLW         57.32743073 W
SFO1         100.628886 MHz

===== CHANNEL f2 =====
CPDPRG2       waltz16
NUC2          1H
PCPD2         80.00 usec
PL2          -1.00 dB
FLL2         14.02 dB
PL13         14.46 dB
PL2W         13.18669796 W
PL12W        0.41508400 W
PL13W        0.37509048 W
SFO2         400.1716007 MHz
SI           32768
SF           100.62828246 MHz
WDW           EM
SSB           0
LB           1.00 Hz
GB           0
PC           1.40
    
```

19.56  
20.25

37.36

52.07

76.73  
77.04  
77.18  
77.36

120.20  
123.92  
124.26  
125.42  
128.57  
129.25  
136.46  
137.37  
139.74  
142.57

162.01

170.24

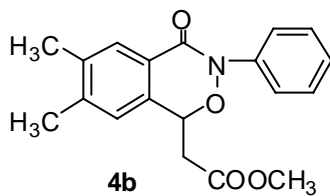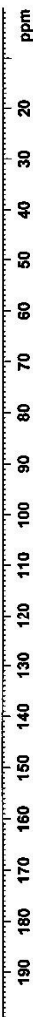

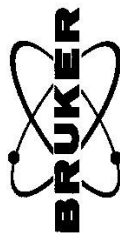

NAME SZX13-55  
EXPNO 1  
PROCNO 1  
Date\_ 20110418  
Time 15.11  
INSTRUM spect  
PROBHD 5 mm PABBO BB-  
PULPROG zg30  
TD 65536  
SOLVENT CDCl3  
NS 16  
DS 2  
SWH 8223.685 Hz  
FIDRES 0.125483 Hz  
AQ 3.9846387 sec  
RG 203  
DW 60.800 usec  
DE 6.50 usec  
TE 299.6 K  
D1 1.0000000 sec  
TDO 1  
===== CHANNEL f1 =====  
NUC1 1H  
P1 14.20 usec  
PL1 -1.00 dB  
PL1W 13.18669796 W  
SF01 400.1724712 MHz  
SI 32768  
SF 400.1700039 MHz  
WDW EM  
SSB 0  
LB 0.30 Hz  
GB 0  
PC 1.00

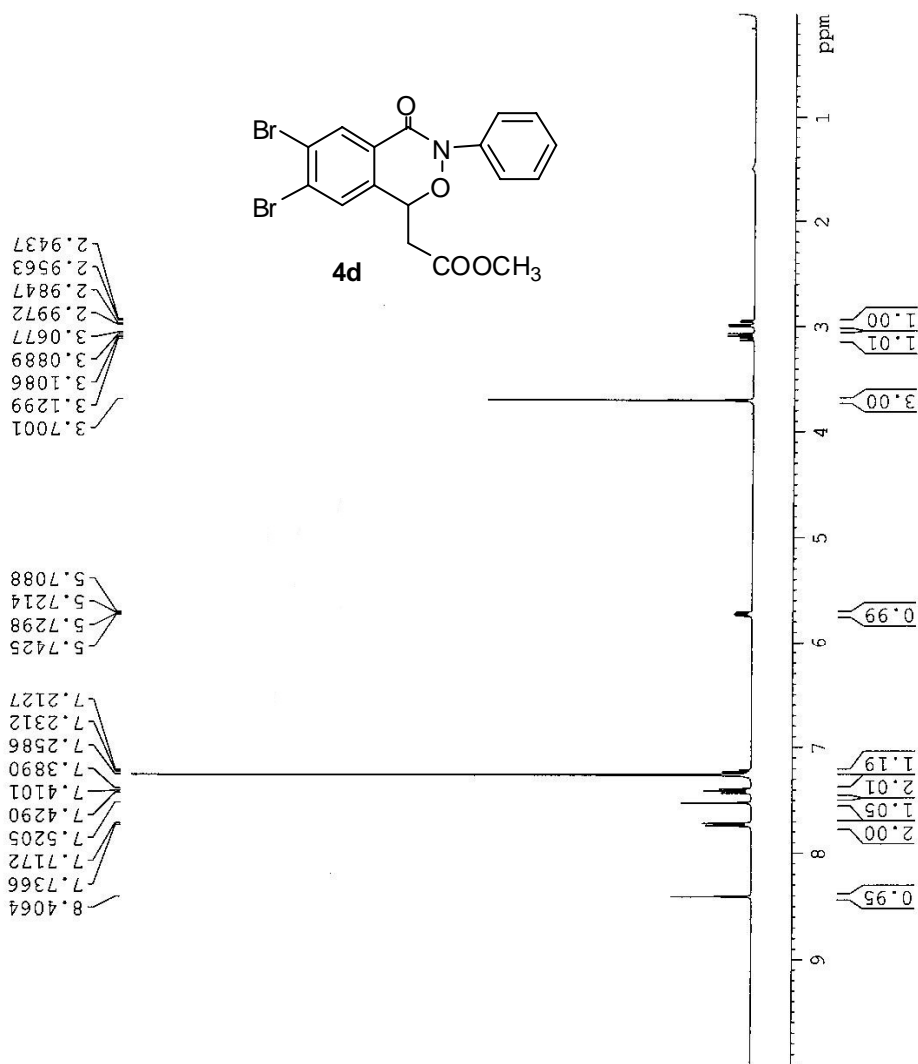

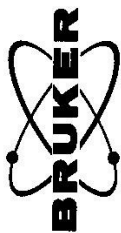

NAME szx13-55-C13  
EXPNO 1  
PROCNO 1  
Date\_ 20110418  
Time\_ 21.16  
INSTRUM spect  
PROBHD 5 mm PABBO BB-  
PULPROG zgpg30  
TO 63536  
SOLVENT CDCl3  
NS 622  
DS 4  
SWH 24038.461 Hz  
FIDRES 0.366798 Hz  
AQ 1.3631988 sec  
RG 203  
DW 20.800 usec  
DE 6.50 usec  
TE 300.1 K  
D1 2.0000000 sec  
D11 0.0300000 sec  
TD0 1

===== CHANNEL f1 =====  
NUC1 13C  
P1 8.70 usec  
PL1 -2.00 dB  
PL1W 57.32743073 W  
SFO1 100.6228888 MHz

===== CHANNEL f2 =====  
CEDPRG2 waltz16  
NUC2 1H  
PCPD2 80.00 usec  
PL2 -1.00 dB  
PL12 14.02 dB  
PL13 14.46 dB  
PL2W 13.18669796 W  
PL12W 0.41508400 W  
PL13W 0.37509048 W  
SFO2 400.1716007 MHz  
SI 32768  
SF 100.6228246 MHz  
WDW EM  
SSB 0  
LB 1.00 Hz  
GB 0  
PC 1.40

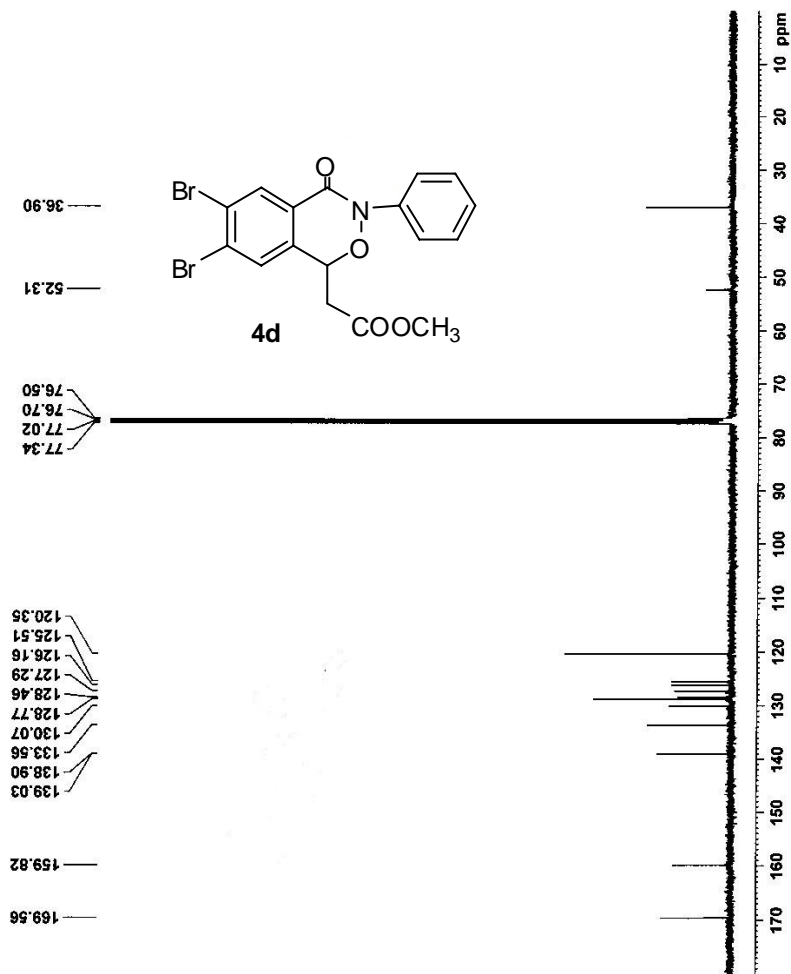

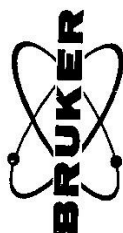

```

NAME          SZX13-43a
EXPNO         1
PROCNO        1
Date_         20110411
Time_         9.28
INSTRUM       spect
PROBHD        5 mm PAEBQ BB-
PULPROG       zg30
TD            65536
SOLVENT       CDCl3
NS            16
DS            2
SWH           8223.685 Hz
FIDRES        0.125483 Hz
AQ            3.9846387 sec
RG            203
DW            60.800 usec
DE            6.50 usec
TE            295.1 K
D1            1.00000000 sec
TDO           1

===== CHANNEL f1 =====
NUC1          1H
P1            14.20 usec
PL1          -1.00 dB
PL12         13.18669796 W
SF01         400.1724712 MHz
SI           32768
SF           400.1700029 MHz
WDW          EM
SSB          0
LB           0.30 Hz
GB           0
PC           1.00
    
```

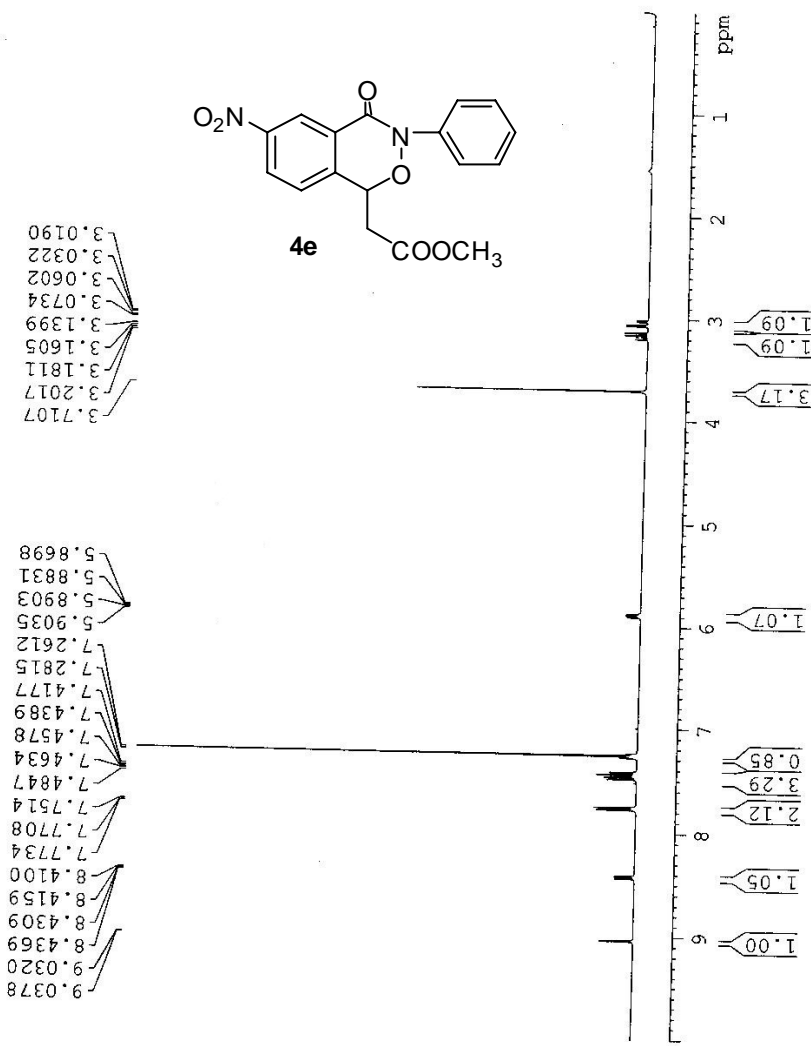



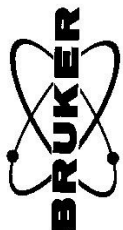

```

NAME          SZX13-43a-C13
EXPNO         1
PROCNO        1
Date_         20110412
Time          1.57
INSTRUM       spect
PROBHD        5 mm PABBO BB-
PULPROG       zgpg30
TD            65536
SOLVENT       CDCl3
NS            1600
DS            4
SWH           24038.461 Hz
FIDRES        0.366798 Hz
AQ            1.3631986 sec
RG            203
DW            20.800 usec
DE            6.50 usec
TE            297.5 K
D1            2.00000000 sec
D11           0.03000000 sec
TD0           1

===== CHANNEL f1 =====
NUC1          13C
P1            8.70 usec
PL1           -2.00 dB
PL1W         57.32743073 W
SFO1         100.6328888 MHz

===== CHANNEL f2 =====
CPDPRG2       waltz16
NUC2          1H
PCPD2         80.00 usec
PL2           -1.00 dB
PL12         14.02 dB
PL13         14.86 dB
PL14         14.86 dB
PL12W        13.18669796 W
PL12W        0.41508400 W
PL13W        0.37509008 W
SFO2         400.1760007 MHz
SI            32768
SF            100.6228258 MHz
WDW           EM
SSB           0
LB            1.00 Hz
GB            0
PC            1.40
    
```

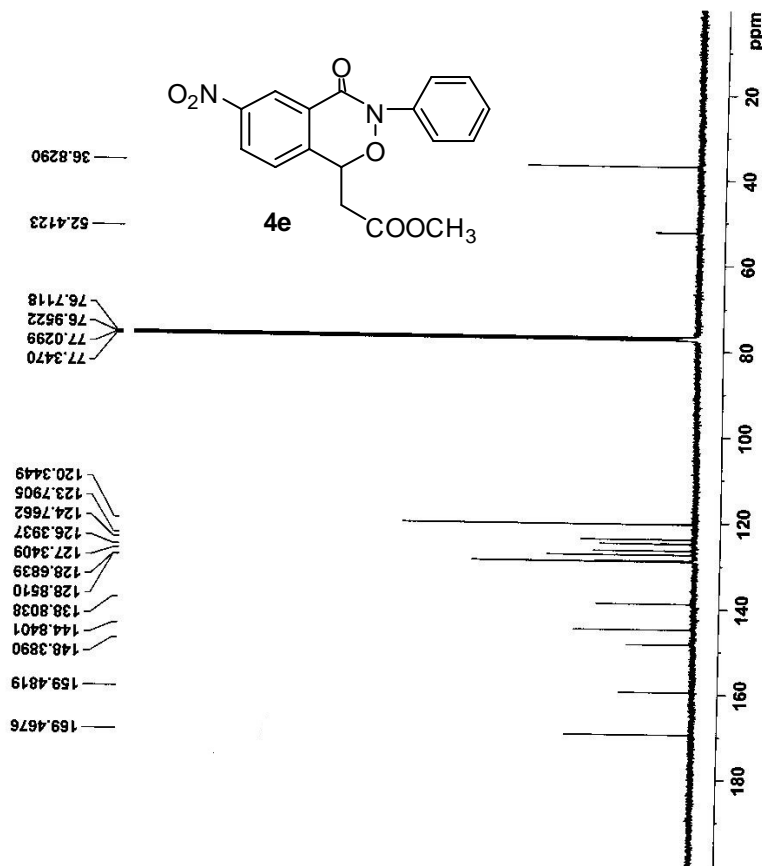

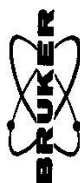

```

SZX12-19-2B
NAME EXPNO 1
PROCNO 1
Date_ 20110221
Time_ 9.46
INSTRUM spect
PROBHD 5 mm PABBO BB-
PULPROG zg30
TD 65536
SOLVENT CDCl3
NS 16
DS 2
SWH 8223.685 Hz
FIDRES 0.125483 Hz
AQ 3.9846387 sec
RG 203
DW 60.800 usec
DE 6.50 usec
TE 292.3 K
D1 1.00000000 sec
TD0 1
===== CHANNEL f1 =====
NUC1 1H
P1 14.20 usec
PL1 -1.00 dB
PL12 13.19665796 W
SFO1 400.1724712 MHz
SI 32768
SF 400.1700027 MHz
WDW EM
SSB 0
LB 0
GB 0
PC 1.00
    
```

1.5969  
 2.3583  
 2.9616  
 2.9734  
 3.0022  
 3.0140  
 3.0934  
 3.1156  
 3.1340  
 3.1582  
 3.6964  
 5.7731  
 5.7849  
 5.7951  
 5.8069  
 7.1978  
 7.2182  
 7.2616  
 7.4808  
 7.4995  
 7.5183  
 7.5430  
 7.5464  
 7.5618  
 7.5649  
 7.5805  
 7.5836  
 7.6252  
 7.6475  
 8.1803  
 8.1996

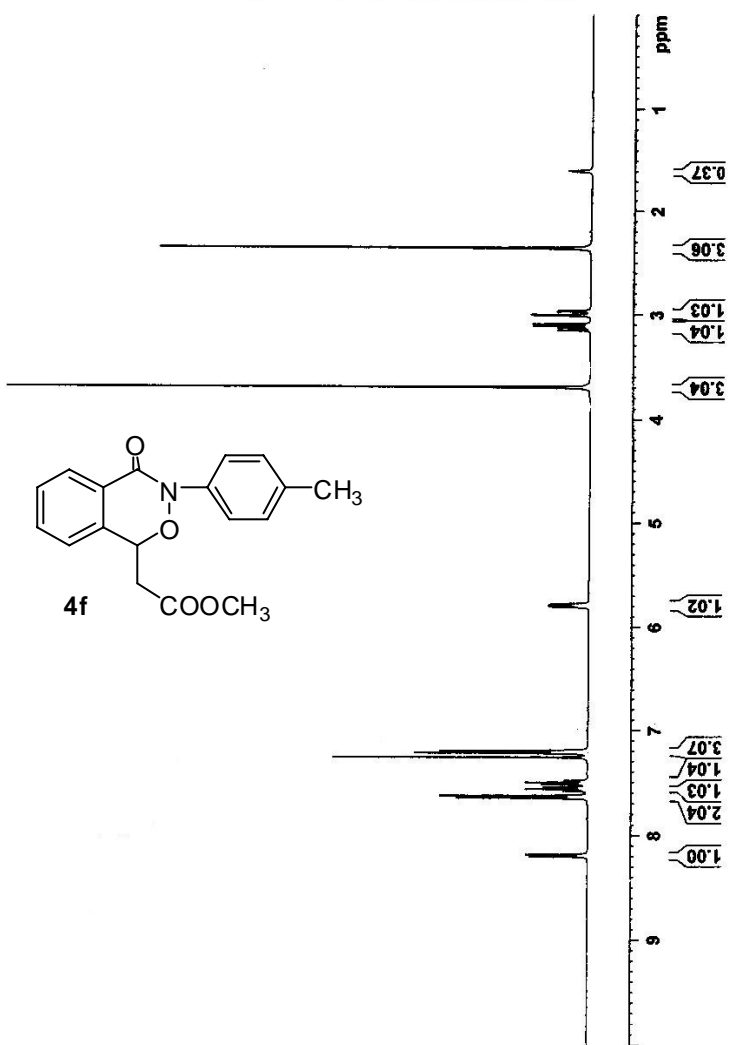

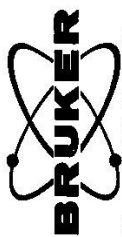

```

NAME          szx12-19-2b-cl3
EXPNO        1
PROCNO       1
Date_        20110303
Time_        21.29
INSTRUM      spect
PROBHD       5 mm PABBO BB
PULPROG      zgpg30
TD           65536
SOLVENT      CDCl3
NS           278
DS           4
SWH          24038.461 Hz
FIDRES       0.366798 Hz
AQ           1.3631988 sec
RG           203
DW           20.800 usec
DE           6.50 usec
TE           294.7 K
D1           2.0000000 sec
D11          0.0300000 sec
TDO          1

===== CHANNEL f1 =====
NUC1         13C
P1           8.70 usec
PL1          -2.00 dB
PL12         57.32743073 W
SF01         100.6328888 MHz

===== CHANNEL f2 =====
CPDPRG2      waltz16
NUC2         1H
PCPD2        80.00 usec
PL2          -1.00 dB
PL12         14.02 dB
PL13         14.46 dB
PL14         13.186669796 W
PL12W        0.41508400 W
PL13W        0.37509048 W
SF02         400.1716007 MHz
SI           32768
SF           100.6228276 MHz
WDW          EM
SSB          0
LB           1.00 Hz
GB           0
PC           1.40
    
```

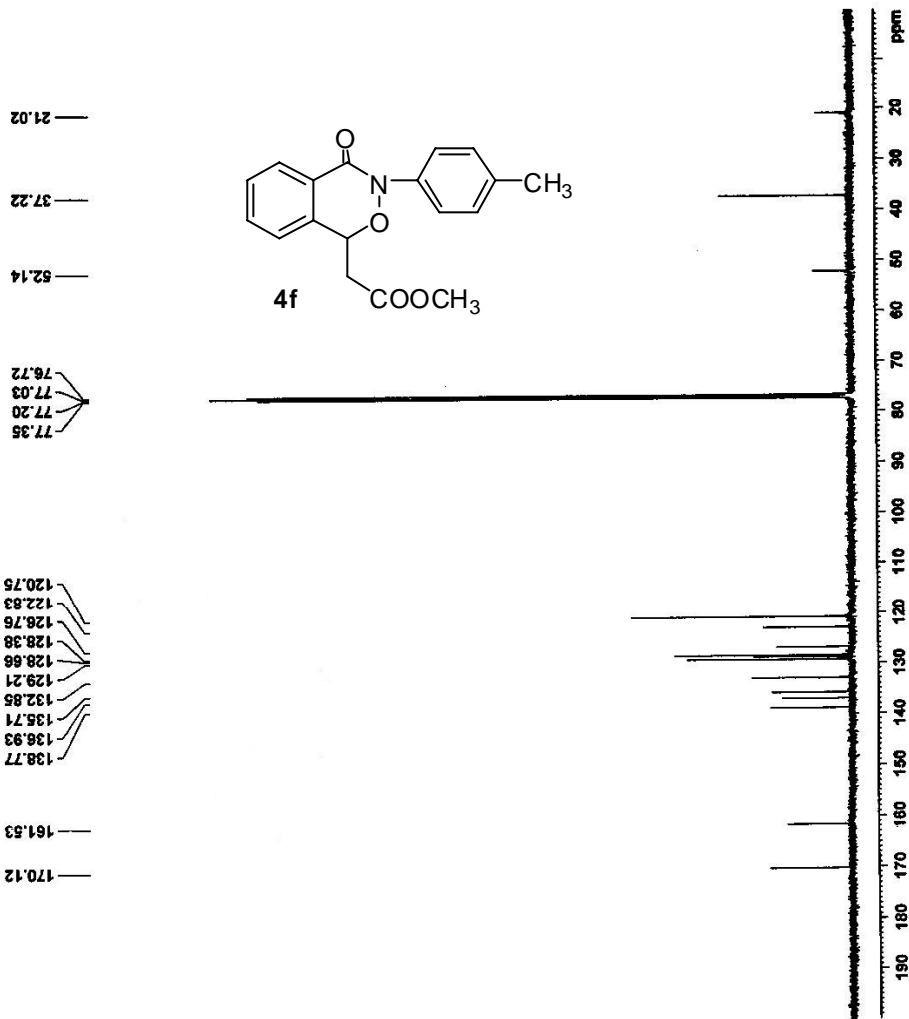

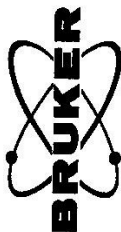

NAME SXX12-76  
EXPNO 1  
PROCNO 1  
Date\_ 20110308  
Time\_ 9.46  
INSTRUM spect  
PROBHD 5 mm PABBO BB-  
PULPROG zg30  
TD 65536  
SOLVENT CDCl3  
NS 16  
DS 2  
SWH 8223.685 Hz  
FIDRES 0.125483 Hz  
AQ 3.9846387 sec  
RG 203  
DW 60.800 usec  
DE 6.50 usec  
TE 293.4 K  
D1 1.00000000 sec  
TDO 1

==== CHANNEL f1 =====  
NUC1 1H  
P1 14.20 usec  
PL1 -1.00 dB  
PL1W 13.18669796 W  
SFOL 400.1724712 MHz  
SI 32768  
SF 400.1700023 MHz  
WDW EM  
SSB 0  
LB 0.30 Hz  
GB 0  
PC 1.00

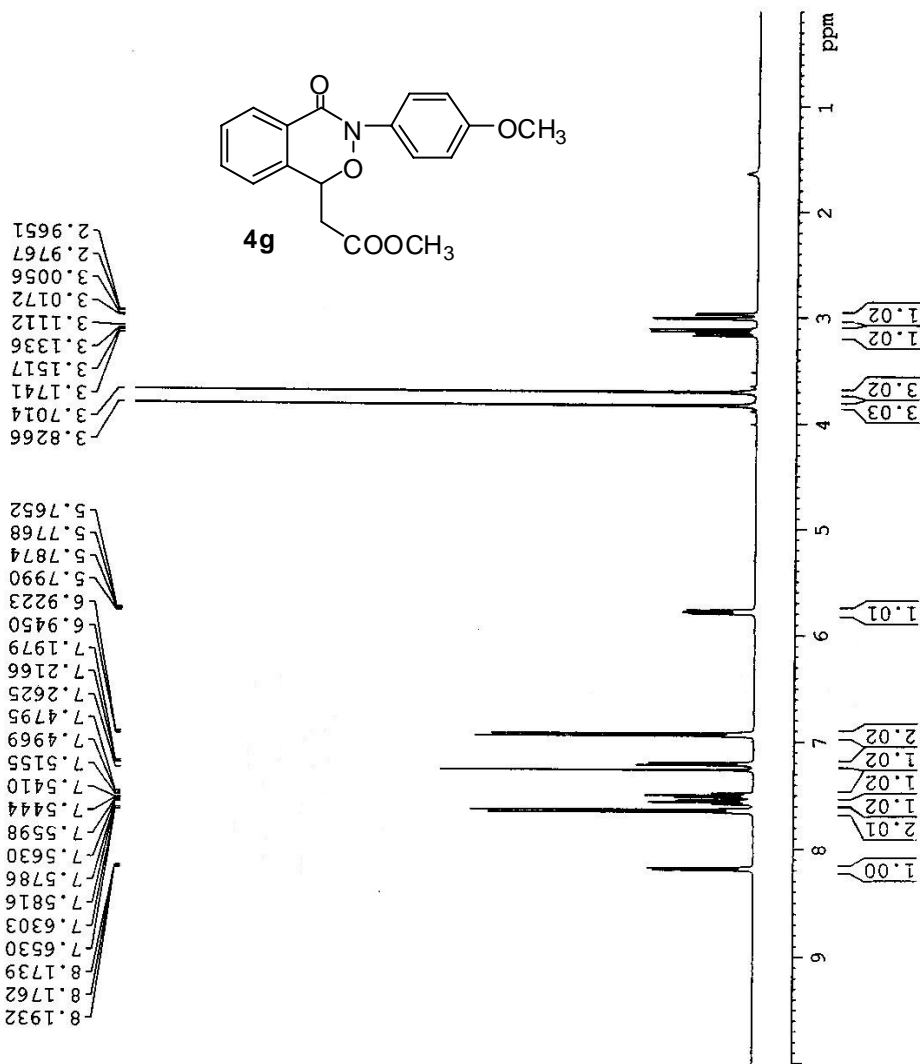

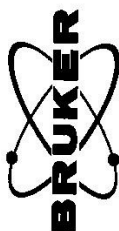

```

NAME          SFX12-76-C13
EXPNO         1
PROCNO        1
Date_         20110310
Time          5.13
INSTRUM       spect
PROBHD        5 mm PABBO BE
PULPROG       zgpg30
TD            65536
SOLVENT       CDCl3
NS            2000
DS            4
SWH           24038.461 Hz
FIDRES        0.366798 Hz
AQ            1.3631988 sec
RG            203
DW            20.800 usec
DE            6.50 usec
TE            295.4 K
D1            2.00000000 sec
D11           0.03000000 sec
TD0           1
===== CHANNEL f1 =====
NUC1          13C
P1            8.70 usec
PL1           -2.00 dB
PL1W         57.32743073 W
SF01         100.6328888 MHz
===== CHANNEL f2 =====
CPDPRG2      waltz16
NUC2          1H
PCPD2        80.00 usec
PL2           -1.00 dB
PL12         14.02 dB
PL13         14.46 dB
PL2W         13.18669796 W
PL12W        0.41508400 W
PL13W        0.37509048 W
SF02         400.1716007 MHz
SI            32768
SF           100.6228274 MHz
WDW           EM
SSB           0
LB            1.00 Hz
GB            0
PC            1.40
    
```

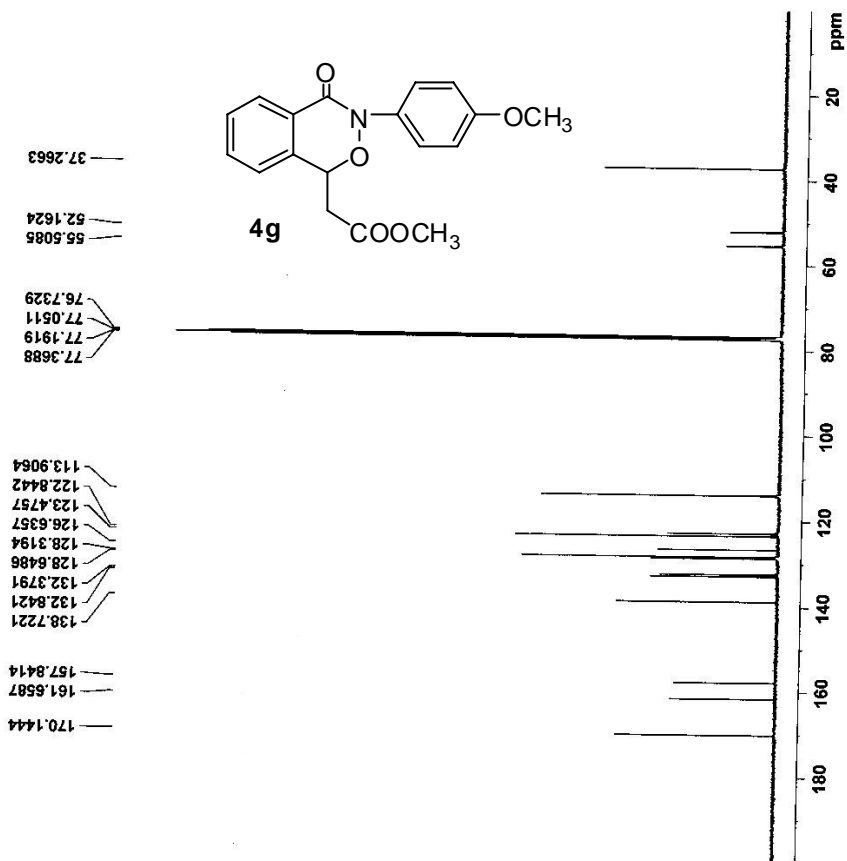

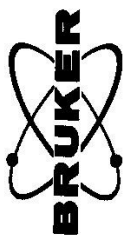

```
NAME          SZX13-21
EXPNO         1
PROCNO        1
Date_         20110321
Time          14.52
INSTRUM       spect
PROBHD        5 mm PABBO BB-
PULPROG       zg30
TD            65536
SOLVENT       CDCl3
NS            16
DS            2
SWH           8223.685 Hz
FIDRES        0.125483 Hz
AQ            3.9846387 sec
RG            203
DM            60.800 usec
DE            6.50 usec
TE            296.3 K
D1            1.0000000 sec
TD0           1
===== CHANNEL f1 =====
NUC1          1H
P1            14.20 usec
PL1           -1.00 dB
P2            13.18669796 W
SFO1          400.1724712 MHz
SI            32768
SF            400.1700032 MHz
WDW           EM
SSB           0
LB            0.30 Hz
GB            0
PC            1.00
```

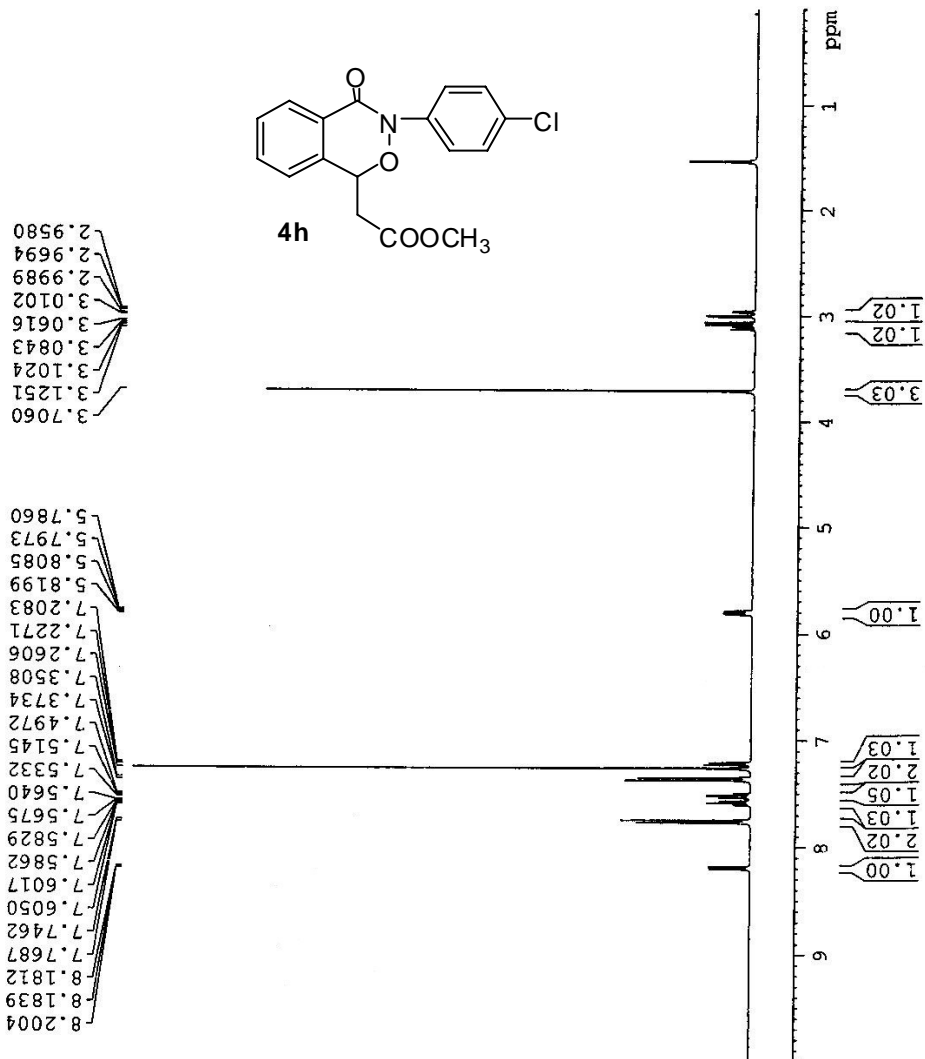

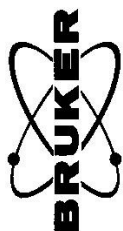

```

NAME          S2X13-21-C13
EXPNO        1
PROCNO       1
PROCNO2      1
Time         20110322
Date_       8.34
INSTRUM      spect
PROBHD       5 mm PABBO BB-
PULPROG      zgpg30
TD           65536
SOLVENT      CDCl3
NS           582
DS           4
SWH          24038.461 Hz
FIDRES       0.366798 Hz
AQ           1.363198 sec
RG           327.5
DM           20.800 uSsec
DE           6.50 uSsec
TE           295.1 K
D1           2.0000000 sec
D11          0.03000000 sec
TD0          1

===== CHANNEL f1 =====
NUC1         13C
P1           8.70 uSsec
PL1         0.00 dB
PL12        57.32743073 dB
SFO1         100.628888 MHz

===== CHANNEL f2 =====
NAME         waltz16
NUC2         13C
PCPG2       80.00 uSsec
PL2         -1.00 dB
PL12        14.02 dB
PL13        14.46 dB
PL14        13.18668756 W
PL15        0.37500000 W
PL16        0.37500000 W
SFO2         400.1716037 MHz
SI          32768
SF          100.62282456 MHz
WDW         EM
SSB         0
LSSB        1.00 Hz
GB          0
PC          1.40
    
```

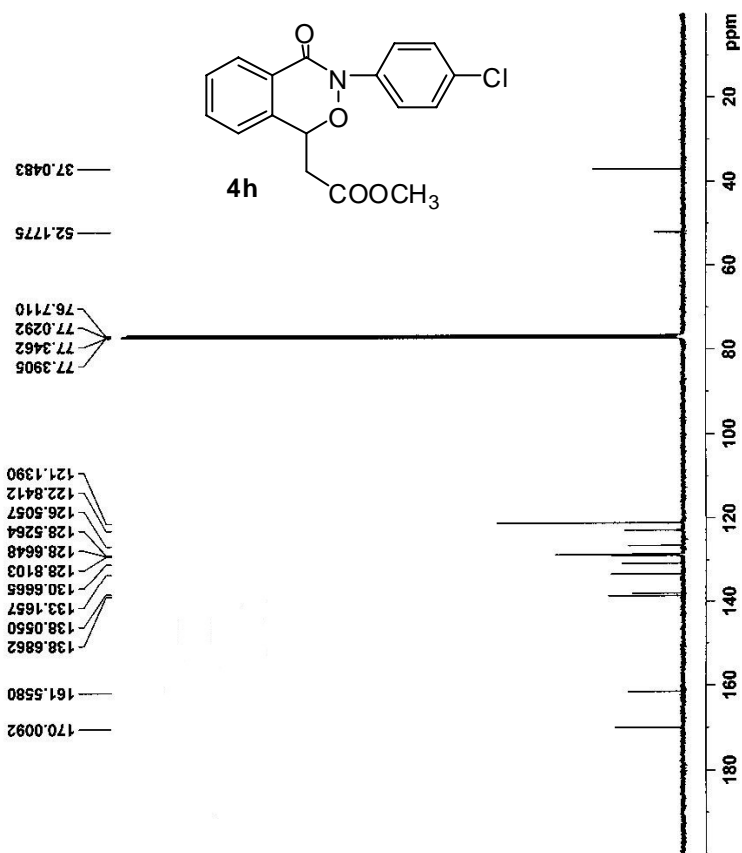

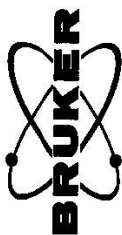

NAME SZX12-73  
 EXPNO 1  
 PROCNO 1  
 Date\_ 20110302  
 Time\_ 16.08  
 INSTRUM spect  
 PROBHD 5 mm PABBO BB-  
 PULPROG zg30  
 TD 65836  
 SOLVENT CDCl3  
 NS 16  
 DS 2  
 SWH 8223.685 Hz  
 FIDRES 0.125485 Hz  
 AQ 3.9846387 sec  
 RG 203  
 DW 60.800 usec  
 DE 6.50 usec  
 TE 294.7 K  
 D1 1.00000000 sec  
 TD0 1  
 ===== CHANNEL f1 =====  
 NUC1 1H  
 P1 14.20 usec  
 PL1 -1.00 dB  
 FLLW 13.18669796 W  
 SFOL 400.1724712 MHz  
 SI 32768  
 SF 400.1700037 MHz  
 EM 0  
 SSB 0  
 LB 0.30 Hz  
 GB 0  
 PC 1.00

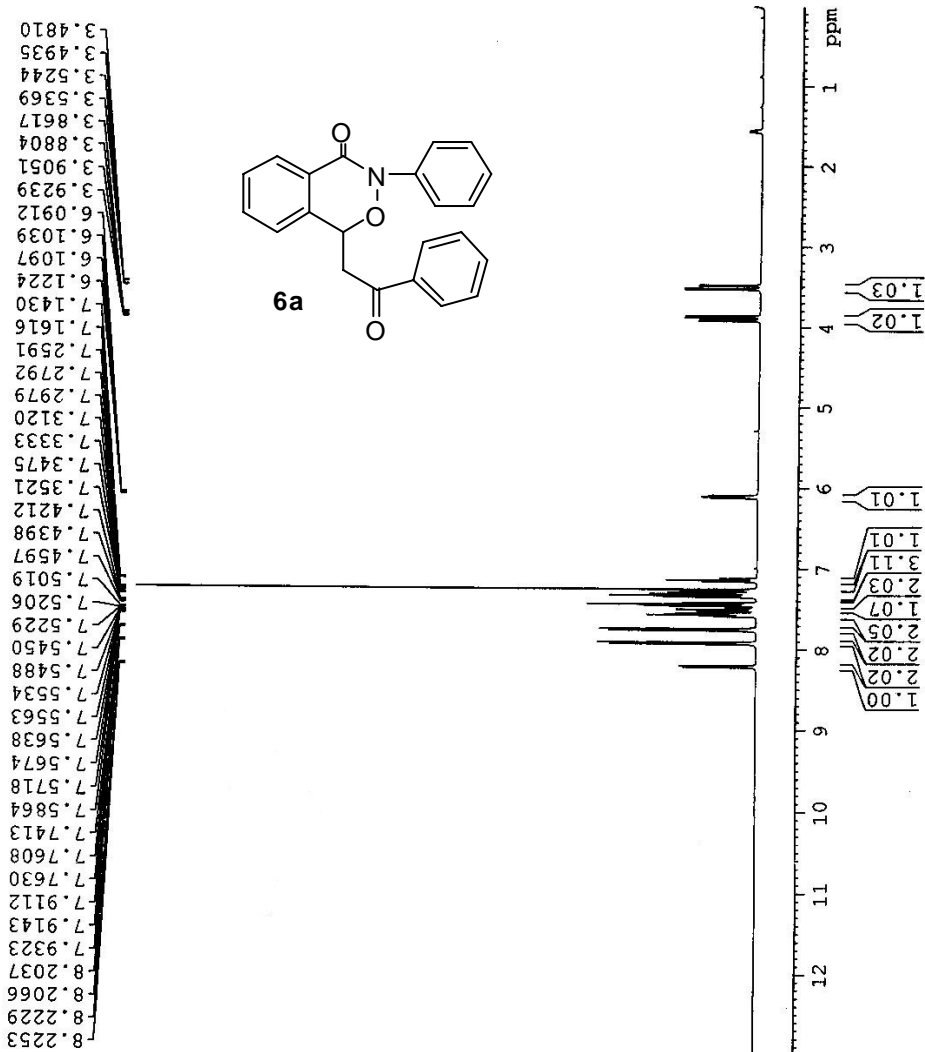



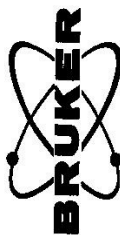

```

NAME          szx12-73-cl3
EXPNO         1
PROCNO        1
Date_         20110303
Time_         21.12
INSTRUM       spect
PROBHD        5 mm PABBO BB-
PULPROG       zgpg30
TD            65536
SOLVENT       CDCl3
NS            936
DS            4
SWH           24038.461 Hz
FIDRES        0.366798 Hz
AQ            1.3631988 sec
RG            203
DW            20.800 usec
DE            6.50 usec
TE            295.2 K
D1            2.0000000 sec
D11           0.03000000 sec
TD0           1

===== CHANNEL f1 =====
NUC1          13C
P1            8.70 usec
PL1           -2.00 dB
PL1W          57.32743073 W
SF01         100.6328888 MHz

===== CHANNEL f2 =====
CPDPRG2       waltz16
NUC2          1H
PCPD2         80.00 usec
PL2           -1.00 dB
PL12         14.02 dB
PL13         14.46 dB
PL1W          13.18663796 W
PL12W         0.41508400 W
PL13W         0.37509048 W
SFO2         400.1716007 MHz
SI            32768
SE           100.6228282 MHz
WDW           EM
SSB           0
LB            1.00 Hz
GB            0
PC            1.40
    
```

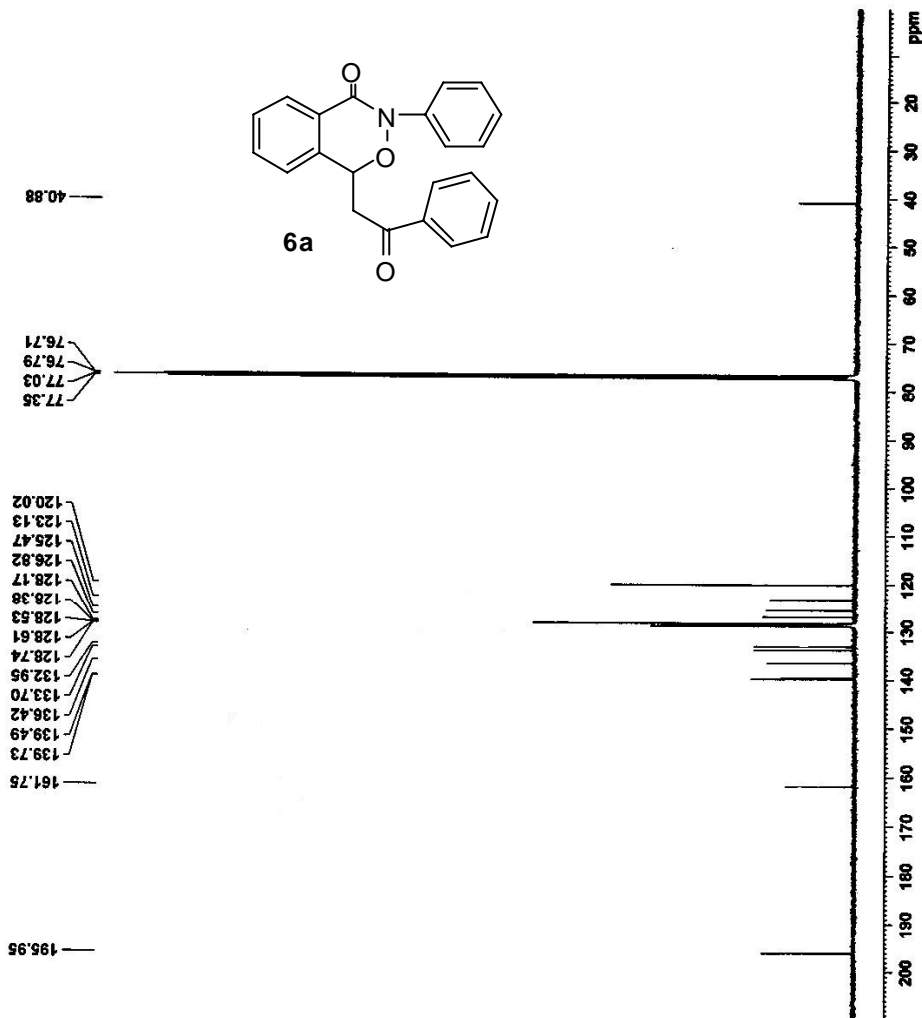

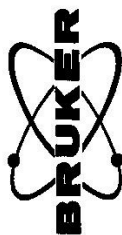

NAME SZX13-24 (2) 1  
EXPNO 1  
PROCNO 1  
Date\_ 20110330  
Time\_ 9.26  
INSTRUM spect  
PROBHD 5 mm PABBO BB-  
PULPROG zg30  
TD 65536  
SOLVENT CDCl3  
NS 16  
DS 2  
SWH 8223.685 Hz  
FIDRES 0.125483 Hz  
AQ 3.9846987 sec  
RG 60.503  
DW 60.800 usec  
DE 6.50 usec  
TE 298.6 K  
D1 1.00000000 sec  
TD0 1  
----- CHANNEL f1 -----  
NUC1 1H  
P1 14.20 usec  
PL1 -1.00 dB  
PL1W 13.18669796 W  
SFO1 400.1724712 MHz  
SI 32768  
SF 400.1700033 MHz  
EM 0  
WDW 0  
SSB 0  
LB 0.30 Hz  
GB 0  
PC 1.00

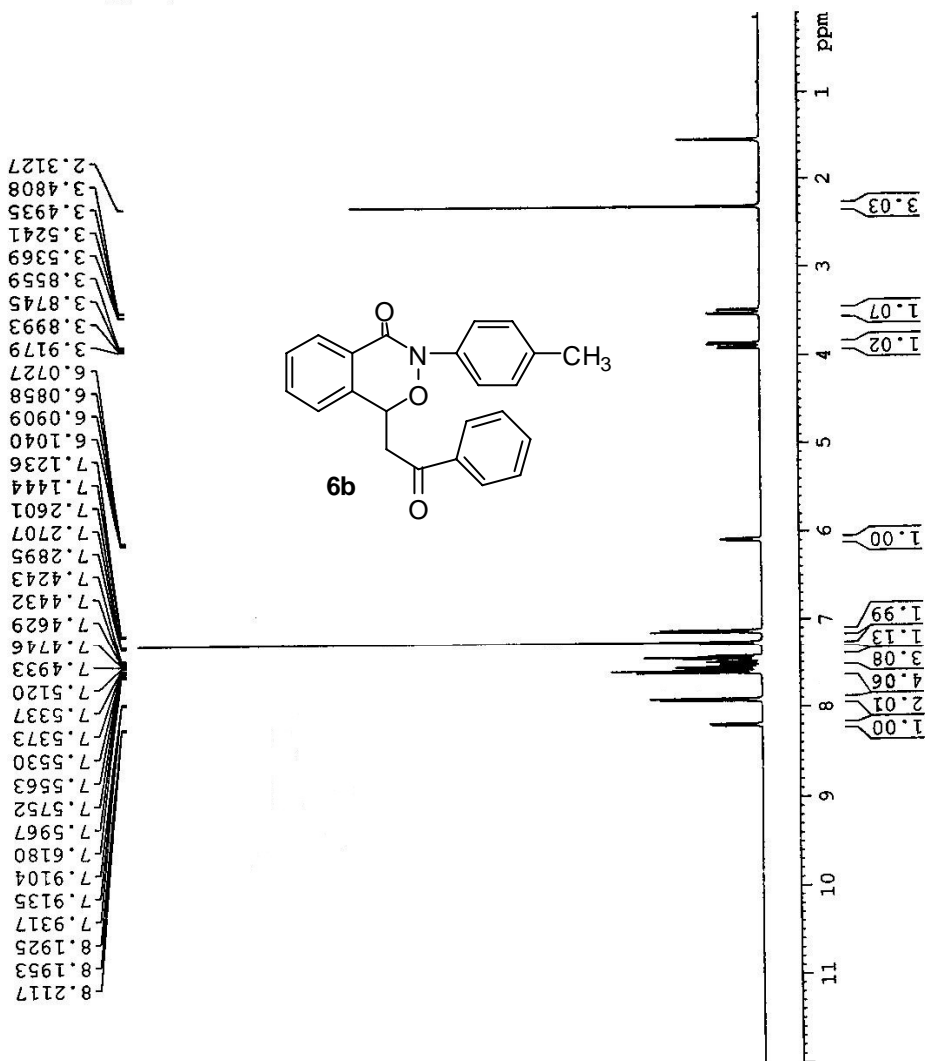

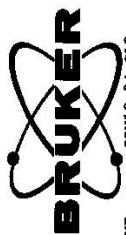

NAME SZX13-24-Cl3  
EXPNO 1  
PROCNO 1  
Date\_ 20110331  
Time 21.18  
INSTRUM spect  
PROBHD 5 mm PABBO BB-  
PULPROG zgpg30  
TD 65536  
SOLVENT CDCl3  
NS 2000  
DS 4  
SWH 24038.461 Hz  
FIDRES 0.366798 Hz  
AQ 1.3631988 sec  
RG 203  
DW 20.800 usec  
DE 6.50 usec  
TE 298.2 K  
D1 2.00000000 sec  
D11 0.03000000 sec  
TDO 1

==== CHANNEL f1 =====  
NUC1 13C  
P1 8.70 usec  
PL1 -2.00 dB  
PL1W 57.32743073 W  
SFO1 100.6328888 MHz

==== CHANNEL f2 =====  
CPDPRG2 waltz16  
NUC2 13C  
PCPD2 80.00 usec  
PL2 -1.00 dB  
PL12 14.00 dB  
PL13 14.00 dB  
PL2W 13.186569796 W  
PL12W 0.41588400 W  
PL13W 0.37509048 W  
SFO2 400.1716007 MHz  
SI 32768  
SF 100.6228267 MHz  
WDW EM  
SSB 0  
LB 1.00 Hz  
GB 0  
PC 1.40

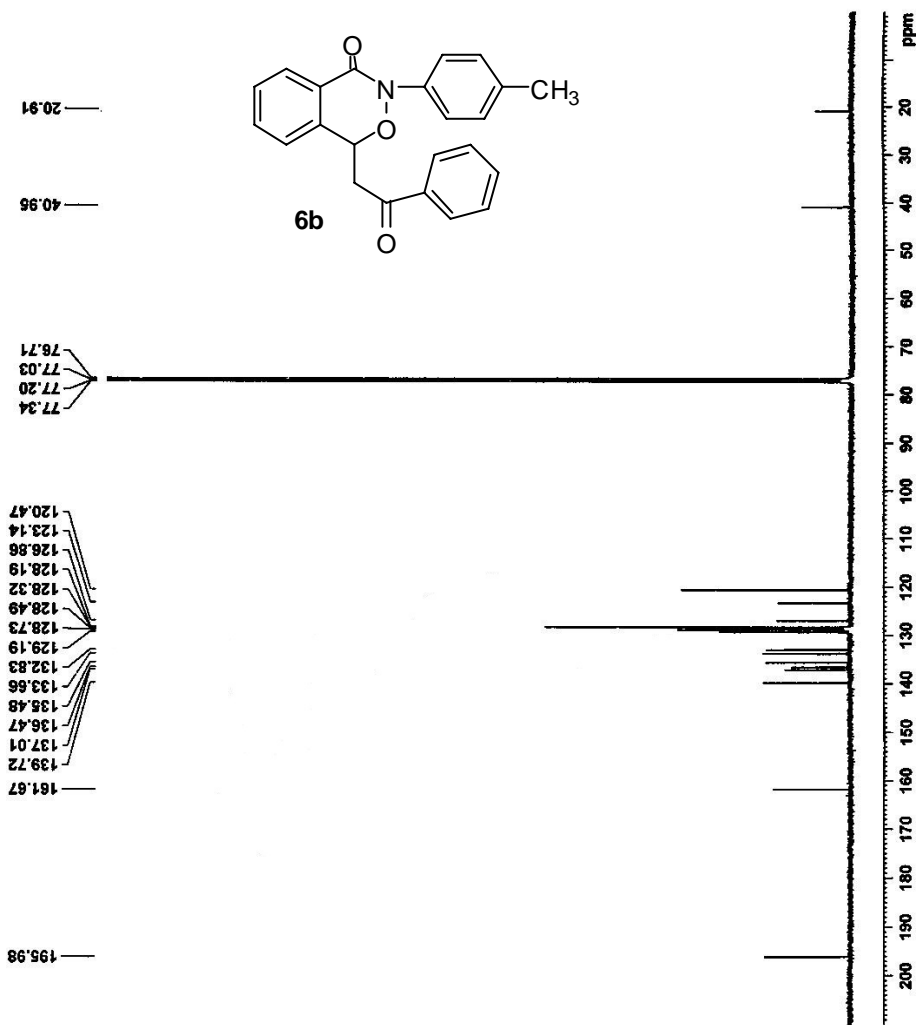

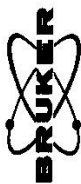

NAME SZX13-35a  
EXPNO 1  
PROCNO 1  
Date\_ 20110401  
Time 9.43  
INSTRUM spect  
PROBHD 5 mm PABBO BB-  
PULPROG zg30  
TD 65536  
SOLVENT CDC13  
NS 16  
DS 2  
SWH 8223.685 Hz  
FIDRES 0.125483 Hz  
AQ 3.9846387 sec  
RG 203  
DW 60.800 usec  
DE 6.50 usec  
TE 295.6 K  
D1 1.00000000 sec  
TDO 1

===== CHANNEL f1 =====  
NUC1 1H  
P1 14.20 usec  
PL -1.00 dB  
PL1W 13.18669796 W  
SFO1 400.1724712 MHz  
SI 32768  
SF 400.1700034 MHz  
WDW EM  
SSB 0  
LB 0.30 Hz  
GB 0  
PC 1.00

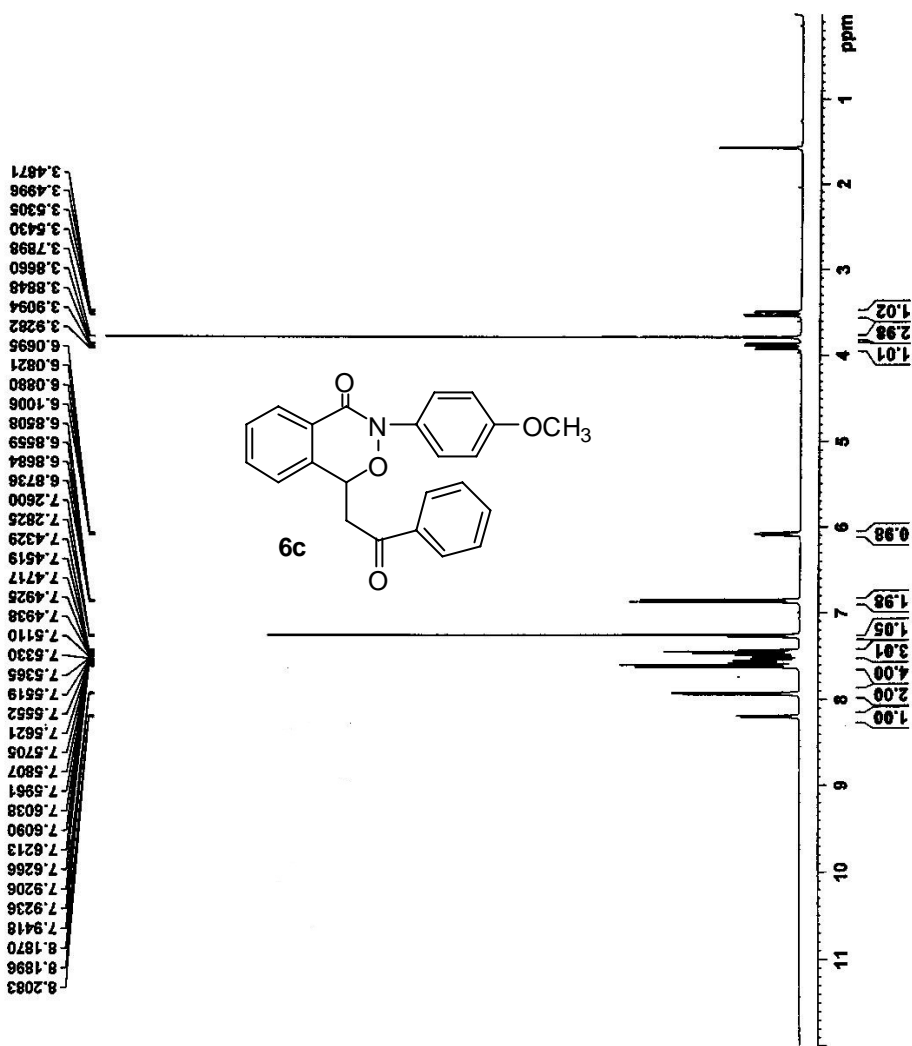

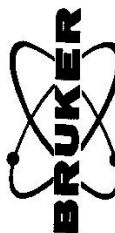

NAME SZX13-35a-Cl3  
 EXPNO 1  
 PROCNO 1  
 Date\_ 20110401  
 Time 22.22  
 INSTRUM spect  
 PROBD 5 mm FAPBO BB-  
 PULPROG zgpg30  
 TD 65536  
 SOLVENT CDCl3  
 NS 2011  
 DS 4  
 SWH 24038.461 Hz  
 FIDRES 0.366798 Hz  
 AQ 1.3631988 sec  
 RG 203  
 DW 20.800 usec  
 DE 6.50 usec  
 TE 300.0 K  
 D1 2.0000000 sec  
 D11 0.0300000 sec  
 TD0 1  
 =====  
 CHANNEL f1 13C  
 NUC1 13C  
 P1 8.70 usec  
 PL1 -2.00 dB  
 PL1W 57.32743073 W  
 SFO1 100.6328888 MHz  
 =====  
 CHANNEL f2 waltz16  
 CPDPRG2 waltz16  
 NUC2 1H  
 PCPD2 80.00 usec  
 PL2 -1.00 dB  
 PL12 14.02 dB  
 PL13 14.46 dB  
 PL2W 13.18665796 W  
 PL12W 0.41508400 W  
 PL13W 0.37509048 W  
 SFO2 400.1716007 MHz  
 SI 32768  
 SF 100.6228273 MHz  
 WDW EM  
 SSB 0  
 LB 1.00 Hz  
 GB 0  
 PC 1.40

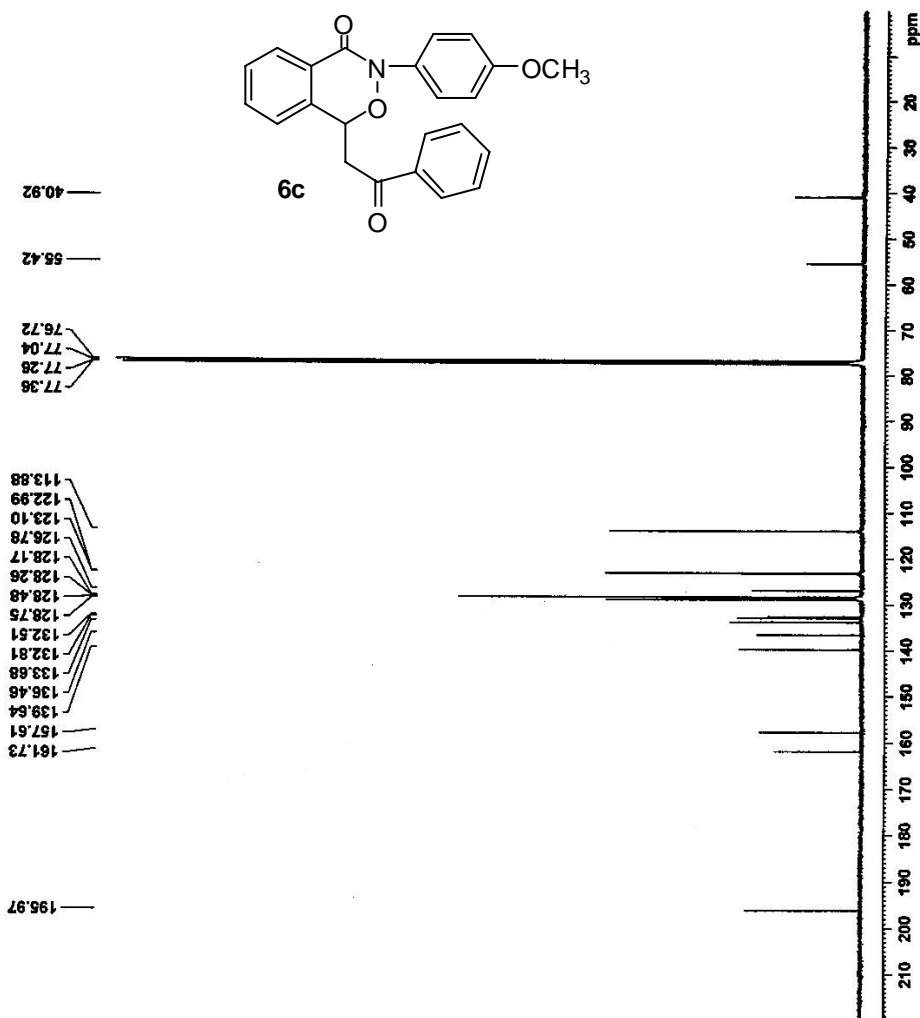

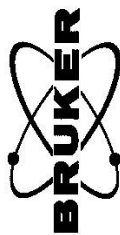

NAME SZX13-25a  
EXPNO 1  
PROCNO 1  
Date\_ 20110402  
Time 14.39  
INSTRUM spect  
PROBHD 5 mm PABBO BB-  
PULPROG zg30  
TD 65536  
SOLVENT CDCl3  
NS 16  
DS 2  
SWH 8223.685 Hz  
FIDRES 0.125483 Hz  
AQ 3.9846387 sec  
RG 203  
DW 60.800 usec  
DE 6.50 usec  
TE 296.1 K  
D1 1.00000000 sec  
D11 1  
===== CHANNEL f1 =====  
NUC1 1H  
P1 14.20 usec  
PL1 -1.00 dB  
PL1W 13.18668796 W  
SF01 400.1724712 MHz  
SI 32768  
SF 400.1700036 MHz  
WDW EM  
SSB 0  
LB 0.30 Hz  
GB 0  
PC 1.00

8.2110  
8.1920  
7.9298  
7.9116  
7.9086  
7.7273  
7.7047  
7.6066  
7.6037  
7.6004  
7.5969  
7.5879  
7.5817  
7.5782  
7.5726  
7.5696  
7.5629  
7.5594  
7.5286  
7.5098  
7.4911  
7.4698  
7.4500  
7.4311  
7.2957  
7.2841  
7.2788  
7.2597  
6.1105  
6.0990  
6.0907  
6.0792  
3.8994  
3.8795  
3.8560  
3.8361  
3.5019  
3.4904  
3.4585  
3.4470

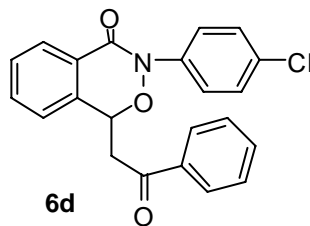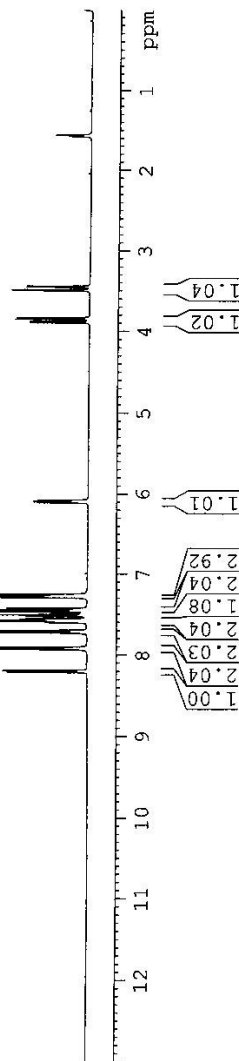

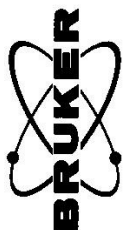

```

NAME          SXAI13-458-c13
EXPNO         1
PROCNO        1
Date_         20110403
Time          19:35
INSTRUM       spect
PROBHD        5 mm PABBO
PULPROG       zgpg30
TD            65536
SOLVENT       CDCl3
NS            2000
DS            4
SFO1          24038.463 Hz
SFO2          0.366798 Hz
FIDRES       1.3631988 sec
AQ            0.720203
RG            203
CW            20.800 usec
PC            297.50 usec
TE            297.2 K
D1            2.0000000 sec
D11           0.0300000 sec
D12           0.0300000 sec
D13           0.0300000 sec
D14           0.0300000 sec
D15           0.0300000 sec
D16           0.0300000 sec
D17           0.0300000 sec
D18           0.0300000 sec
D19           0.0300000 sec
D20           0.0300000 sec
D21           0.0300000 sec
D22           0.0300000 sec
D23           0.0300000 sec
D24           0.0300000 sec
D25           0.0300000 sec
D26           0.0300000 sec
D27           0.0300000 sec
D28           0.0300000 sec
D29           0.0300000 sec
D30           0.0300000 sec
===== CHANNEL f1 =====
NUC1          13C
P1            8.70 usec
PL1          -2.00 dB
PL1W         57.32743073 W
SFO1         100.6282685 MHz
===== CHANNEL f2 =====
CPDPRG2      waltz16
NUC2          1H
PCPD2        80.00 usec
PL2          -1.00 dB
PL2W         14.46 dB
PL3          14.46 dB
PL3W         13.18669796 W
PL4W         0.41508400 W
PL5W         0.37509048 W
SF02         400.1476025 MHz
SF           100.6282685 MHz
WFLW         EM
SSB          0
LB           1.00 Hz
GB           0
PC           1.40
    
```

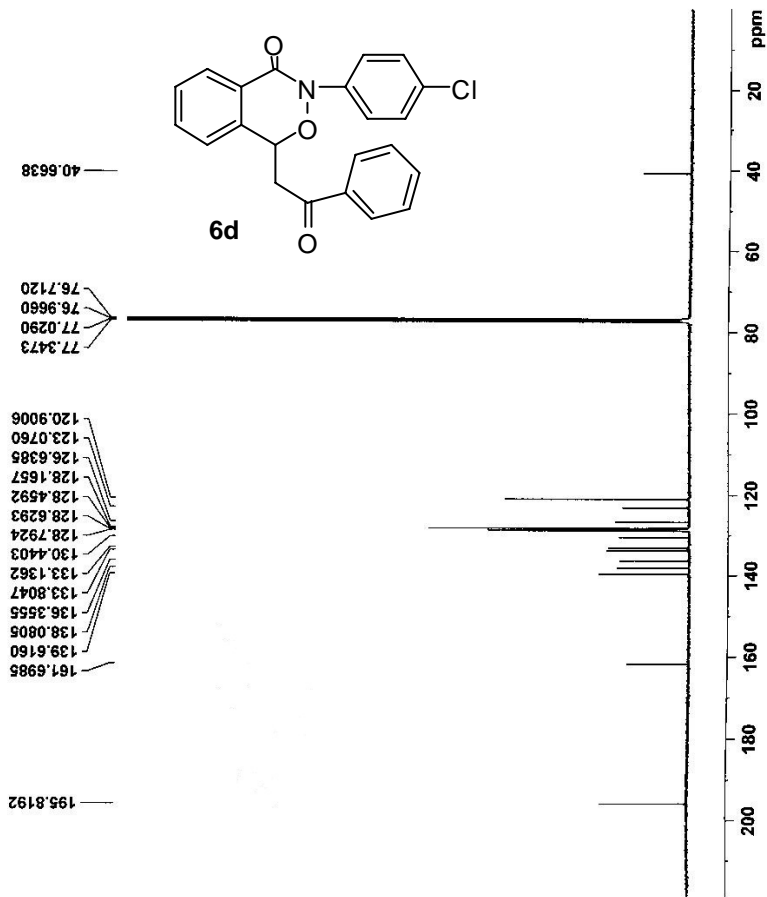

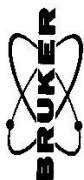

```

NAME          SZX13-46
EXPNO         1
PROCNO        1
Date_         20110412
Time          9.51
INSTRUM       spect
PROBHD        5 mm F4BBO BB-
PULPROG       zg30
TD            65536
SOLVENT       CDCl3
NS            16
DS            2
SWH           8223.685 Hz
FIDRES        0.125483 Hz
AQ            3.9846387 sec
RG            203
DM            60.800 usec
DE            6.50 usec
TE            296.2 K
D1            1.00000000 sec
TD0           1

===== CHANNEL f1 =====
NUC1          1H
P1            14.20 usec
PL1           -1.00 dB
PL1W          13.18689796 W
SFO1          400.1724712 MHz
SI            32768
SF            400.1700041 MHz
WDW           EM
SSB           0
LB            0.30 Hz
GB            0
PC            1.00
    
```

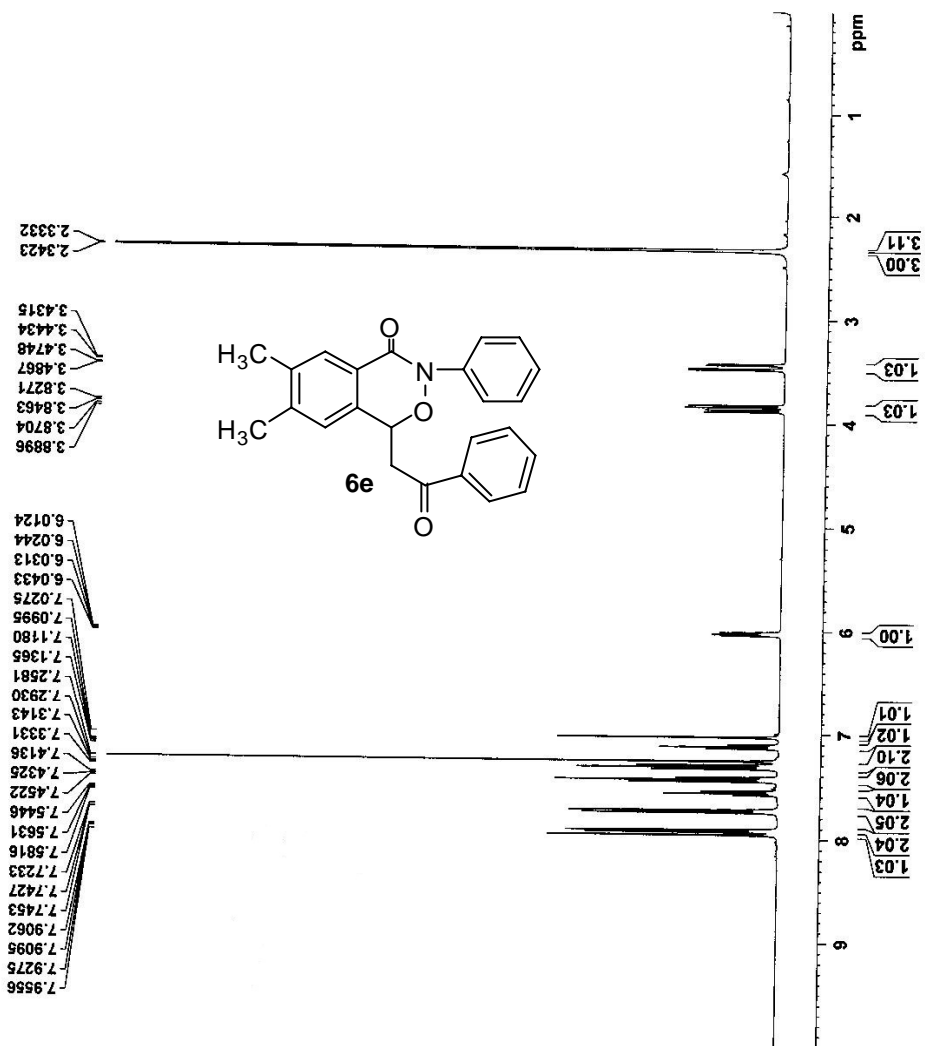



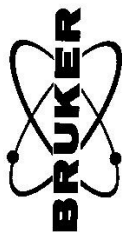

NAME SZX13-46-Cl3  
 EXPNO 1  
 PROCNO 1  
 Date\_ 20110414  
 Time\_ 21.26  
 INSTRUM spect  
 PROBD 5 mm PABRO BB-  
 PULPROG zgpg30  
 TD 65536  
 SOLVENT CDCl3  
 NS 904  
 DS 4  
 SWH 24038.461 Hz  
 FIDRES 0.366798 Hz  
 AQ 1.3651988 sec  
 RG 203  
 DM 20.800 usec  
 DE 6.50 usec  
 TE 300.0 K  
 D1 2.0000000 sec  
 D11 0.0300000 sec  
 TD0 1

===== CHANNEL f1 =====  
 NUC1 13C  
 P1 8.70 usec  
 PL1 -2.00 dB  
 FLLW 57.32743073 W  
 SFO1 100.6328888 MHz

===== CHANNEL f2 =====  
 CPDPRG2 waltz16  
 NUC2 1H  
 P2 80.00 usec  
 PL2 -1.00 dB  
 PL12 14.02 dB  
 PL13 14.46 dB  
 PL2W 13.18669796 W  
 PL12W 0.41508400 W  
 PL13W 0.37509048 W  
 SE02 400.1716007 MHz  
 SI 32768  
 SF 100.6228253 MHz

EM 0  
 SSB 1.00 Hz  
 LB 0  
 GB 0  
 PC 1.40

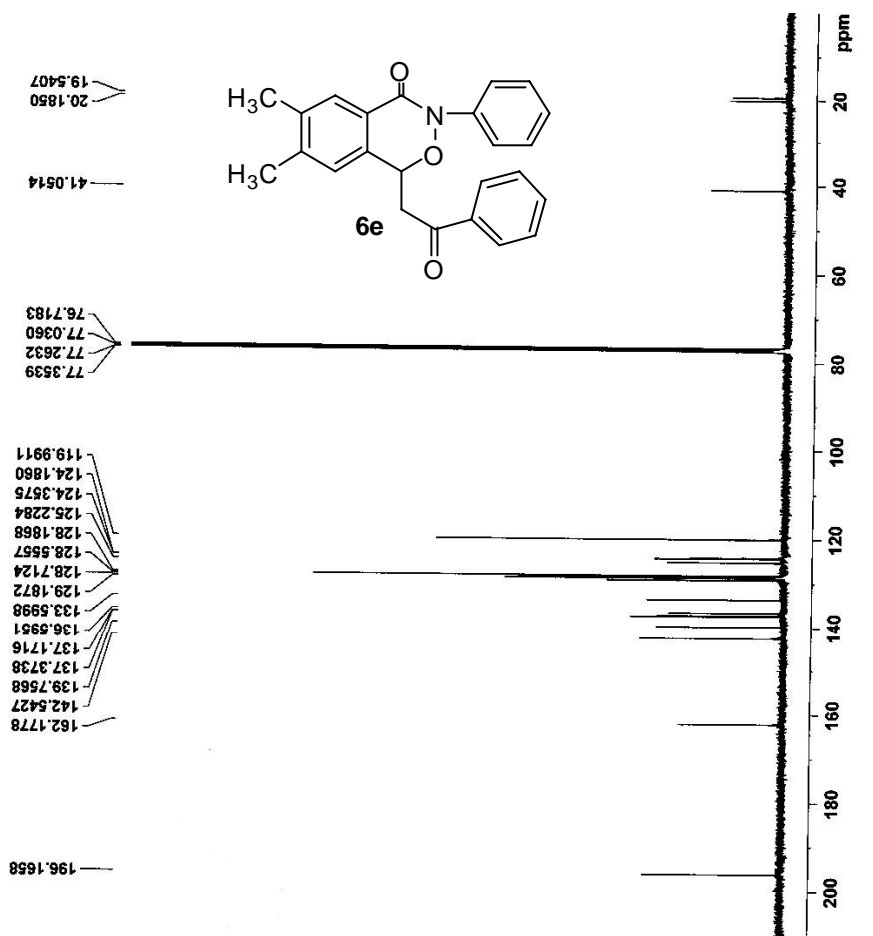

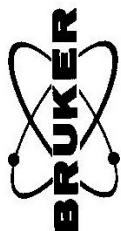

NAME SZX13-56  
EXPNO 1  
PROCNO 1  
Date\_ 20110418  
Time 15.16  
INSTRUM spect  
PROBHD 5 mm PABBO BB-  
PULPROG zg30  
TD 65536  
SOLVENT CDCl3  
NS 16  
DS 2  
SWH 8223.665 Hz  
FIDRES 0.125483 Hz  
AQ 3.9846387 sec  
RG 203  
DM 60.800 usec  
DE 6.50 usec  
TE 299.6 K  
D1 1.00000000 sec  
TDO 1

===== CHANNEL f1 =====  
NUC1 1H  
P1 14.20 usec  
PL1 -1.00 dB  
PL1W 13.18669796 W  
SFO1 400.1724712 MHz  
SI 32768  
SF 400.1700041 MHz  
WDW EM  
SSB 0  
LB 0.30 Hz  
GB 0  
PC 1.00

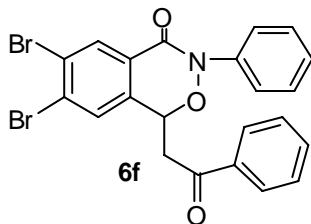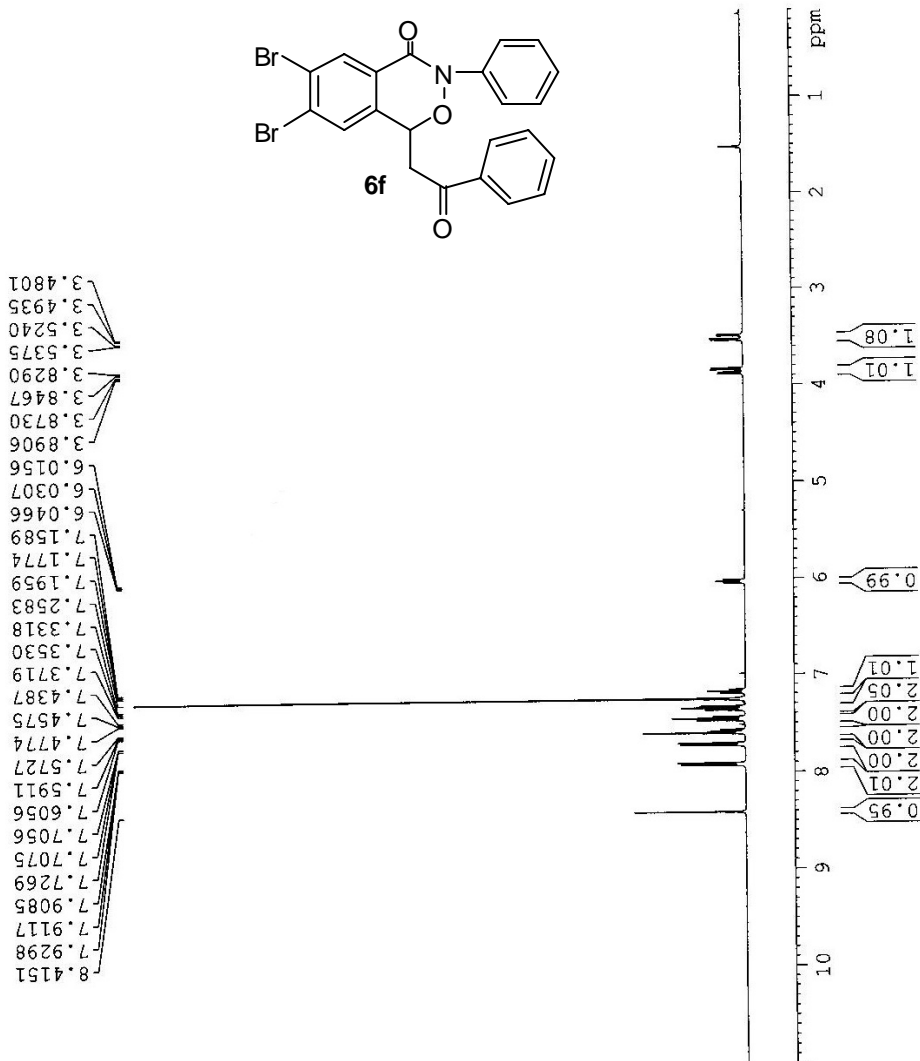

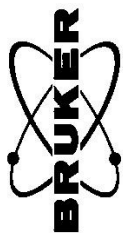

```

NAME          szx13-56-C13
EXPNO         1
PROCNO        1
Date_         20110418
Time          21.26
INSTRUM       spect
PROBHD        5 mm PABBO BB-
PULPROG       zgpg30
TD            65536
SOLVENT       CDCl3
NS            1063
DS            4
SWH           24038.461 Hz
FIDRES        0.366798 Hz
AQ            1.3631988 sec
RG            203
DM            20.800 usec
DE            6.50 usec
TE            299.7 K
D1            2.0000000 sec
D11           0.0300000 sec
TDO           1

===== CHANNEL f1 =====
NUC1          13C
P1            8.70 usec
PL1          -2.00 dB
PL1W         57.32743073 W
SFO1         100.6328888 MHz

===== CHANNEL f2 =====
CPDPRG2       waltz16
NUC2          1H
PCPD2         80.00 usec
PL2          -1.00 dB
PL12         14.02 dB
PL13         14.46 dB
PL1W         13.18569796 W
PL12W        0.41508406 W
PL13W        0.37509048 W
SFO2         400.1716009 MHz
SI            32568
SF           100.6226248 MHz
WDW           EM
SSB           0
LB            1.00 Hz
GB            0
PC            1.40
    
```

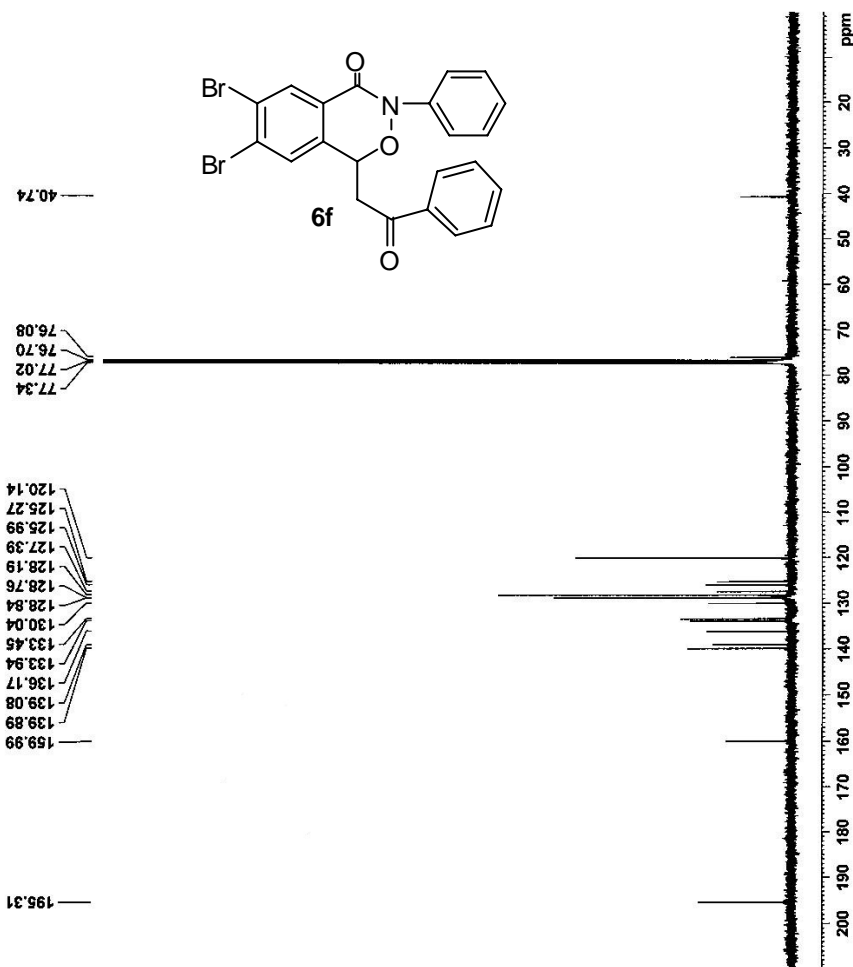

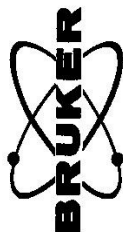

NAME SZX13-34a  
 EXPNO 1  
 PROCNO 1  
 Date\_ 20110402  
 Time 14.44  
 INSTRUM spect  
 PROBHD 5 mm PABBO BB-  
 PULPROG zg30  
 TD 65536  
 SOLVENT CDCl3  
 NS 16  
 DS 2  
 SWH 8223.685 Hz  
 FIDRES 0.125483 Hz  
 AQ 3.9846387 sec  
 RG 203  
 DW 60.800 usec  
 DE 6.50 usec  
 TE 296.0 K  
 D1 1.00000000 sec  
 TDO 1  
 ===== CHANNEL f1 =====  
 NUC1 1H  
 P1 14.20 usec  
 PL1 -1.00 dB  
 ELW 13.18669796 W  
 SF01 400.1724712 MHz  
 SI 32768  
 SF 400.1700032 MHz  
 WDW EM  
 SSB 0  
 LB 0.30 Hz  
 GB 0  
 PC 1.00

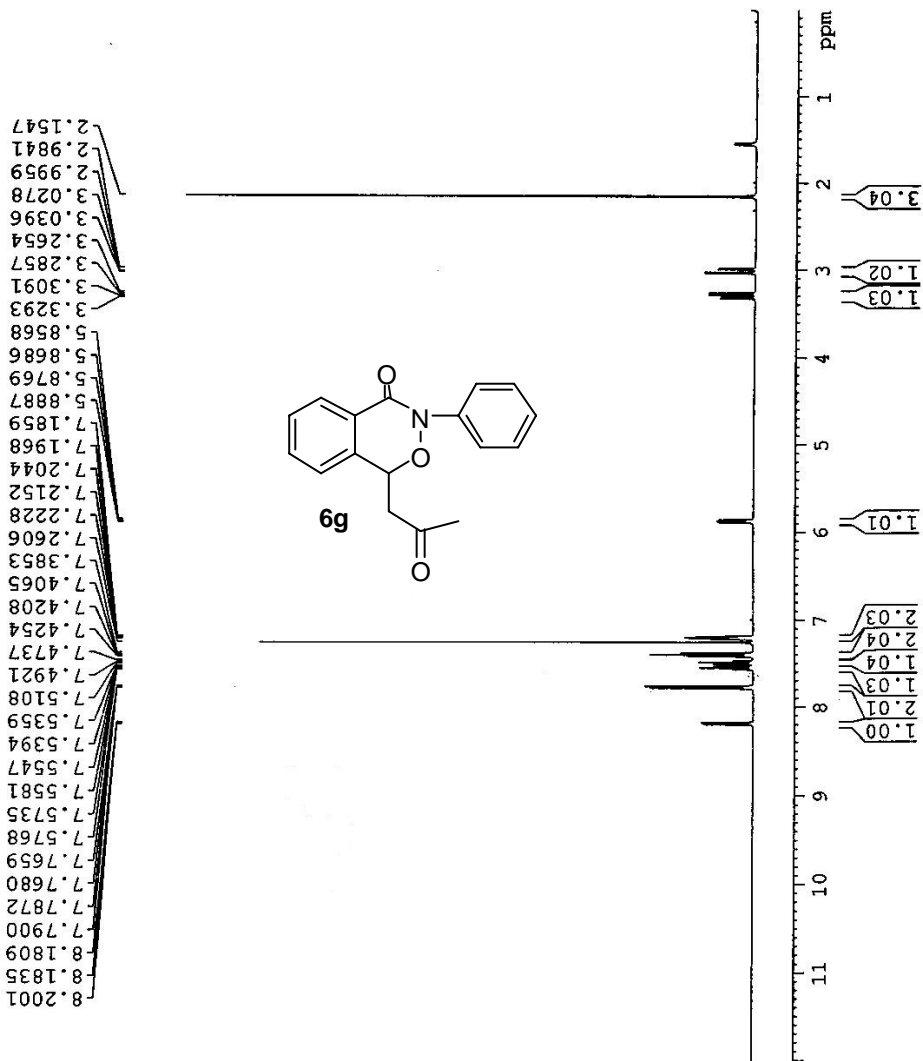

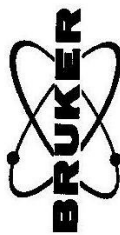

NAME SZX13-34a-C13  
 EXPNO 1  
 PROCNO 1  
 Date\_ 20110403  
 Time 17.34  
 INSTRUM spect  
 PROBHD 5 mm PABBO BB-  
 PULPROG zgpg30  
 TD 65536  
 SOLVENT CDCl3  
 NS 1004  
 DS 4  
 SWH 24038.461 Hz  
 FIDRES 0.366798 Hz  
 AQ 1.3631988 sec  
 RG 203  
 DW 20.800 usec  
 DE 6.50 usec  
 TE 297.5 K  
 D1 2.0000000 sec  
 D11 0.0300000 sec  
 TDO 1

===== CHANNEL f1 =====  
 NUC1 13C  
 P1 8.70 usec  
 PL1 -2.00 dB  
 PL1W 57.32743073 W  
 SFO1 100.628888 MHz

===== CHANNEL f2 =====  
 CPDPRG2 wait-16  
 NUC2 1H  
 PCPD2 80.00 usec  
 PL2 -1.00 dB  
 PL12 14.02 dB  
 PL13 14.46 dB  
 PL2W 13.18669796 W  
 F1L2W 0.41508400 W  
 F1L3W 0.37509048 W  
 SFO2 400.1716007 MHz  
 SI 32768  
 SF 100.628260 MHz  
 WDW EM  
 SSB 0  
 LB 1.00 Hz  
 GB 0  
 PC 1.40

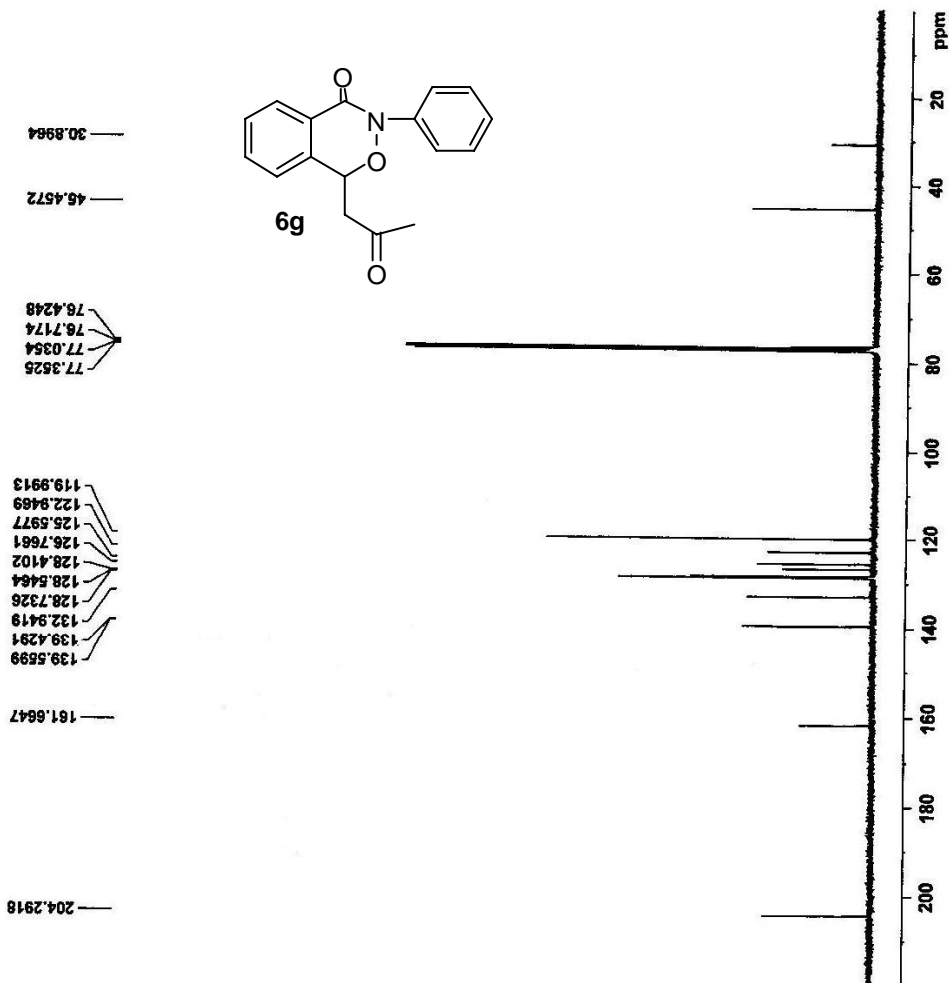

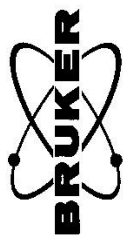

```
NAME          SZX13-62
EXPNO         1
PROCNO        1
Date_         20110422
Time_         10.07
INSTRUM       spect
PROBHD        5 mm PABBO BB-
PULPROG       zg30
TD            65536
SOLVENT       CDCl3
NS            16
DS            2
SWH           8223.685 Hz
FIDRES       0.125483 Hz
AQ           3.9846387 sec
RG           3203
DW           60.800 usec
DE           6.50 usec
TE           295.7 K
D1           1.00000000 sec
TD0          1
===== CHANNEL f1 =====
NUC1          1H
P1           14.20 usec
PL1          -1.70 dB
SFO1         13.18669796 MHz
SF01         400.1724712 MHz
SI           32768
WDW          EM
SSB          0
GB           0.30 Hz
PC           1.00
```

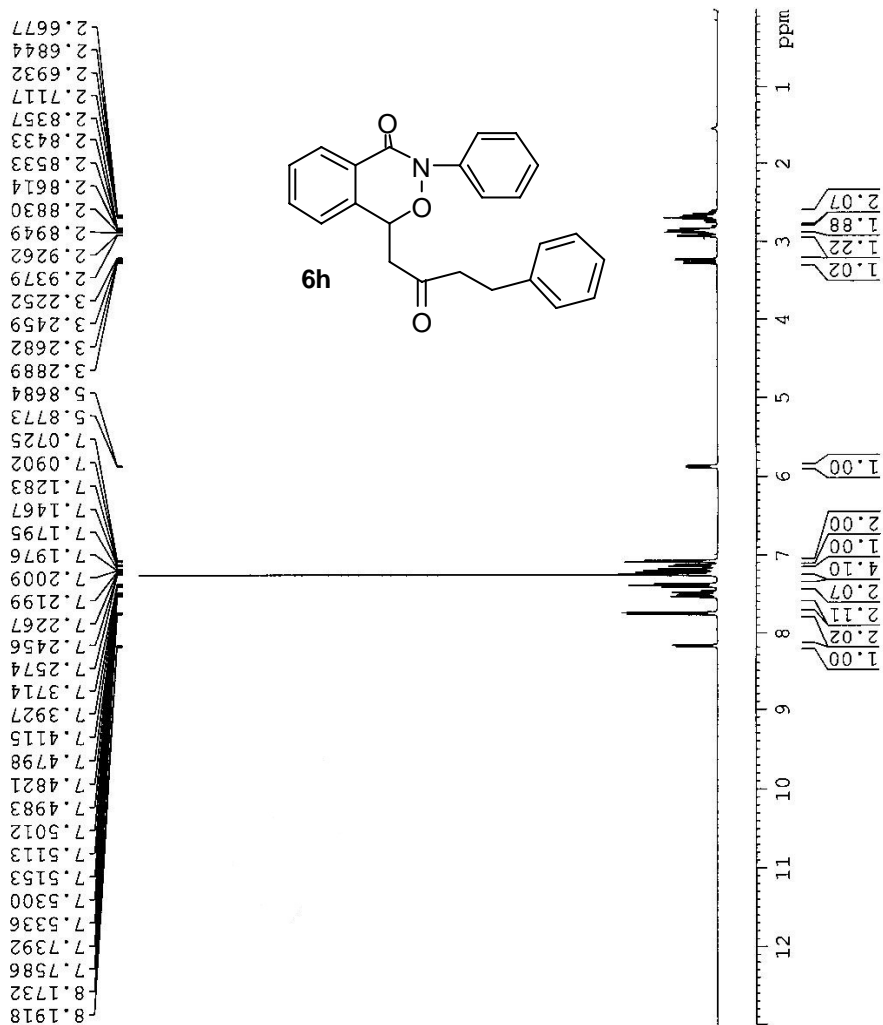

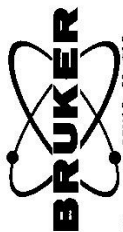

```

NAME          SZX13-62-C13
EXPNO         1
PROCNO        1
Date_         20110423
Time_         16.56
INSTRUM       spect
PROBHD        5 mm PABBO BB-
PULPROG       zgpg30
TD            65536
SOLVENT       CDCl3
NS            3815
DS            4
SWH           24038.461 Hz
FIDRES        0.366798 Hz
AQ            1.3631988 sec
RG            203
DW            20.600 usec
DE            6.50 usec
TE            299.7 K
D1            2.0000000 sec
D11           0.0300000 sec
TD0           1

===== CHANNEL f1 =====
NUC1          13C
P1            8.70 usec
PL1           -2.00 dB
PL1W          57.32743073 W
SFO1          100.628888 MHz

===== CHANNEL f2 =====
CPDPRG2       waltz16
NUC2          1H
PCPDZ         80.00 usec
PL2           -1.00 dB
PL12          14.02 dB
PL13          14.46 dB
PL2W          13.18669796 W
PL12W         0.41508400 W
PL13W         0.37509048 W
SFO2          400.1716007 MHz
SI            32768
SF            100.6228269 MHz
WDW           EM
SSB           0
LB            1.00 Hz
GB            0
PC            1.40
    
```

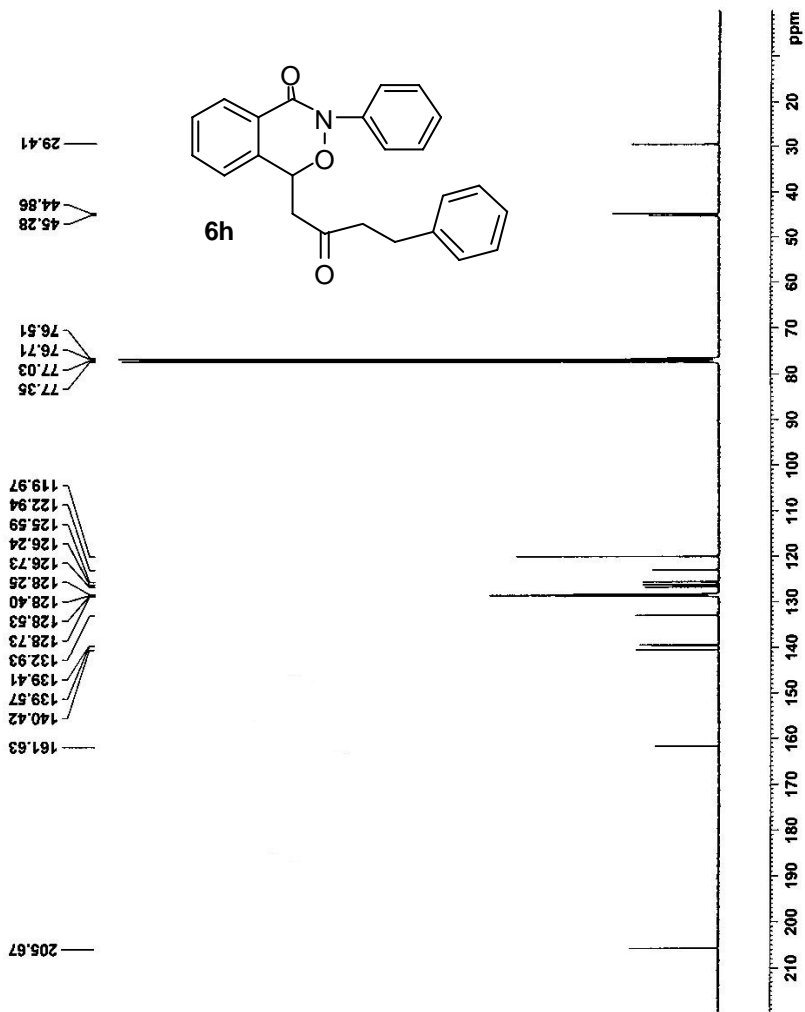

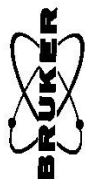

```

NAME          SZX13-50
EXPNO         1
PROCNO        1
Date_         20110414
Time_         16.04
INSTRUM       spect
PROBHD        5 mm PABBO BB-
PULPROG       zg30
TD            65536
SOLVENT       CDCl3
NS            16
DS            2
SWH           8223.685 Hz
FIDRES        0.135483 Hz
AQ            3.9846387 sec
RG            203
DW            60.800 usec
DE            6.50 usec
TE            300.4 K
D1            1.00000000 sec
TD0           1
===== CHANNEL f1 =====
NUC1          1H
P1            14.20 usec
PL1          -1.00 dB
PL1W         13.18663796 W
SF01         400.1724712 MHz
SI           32768
SF           400.1700042 MHz
WDW          EM
SSB          0
LB           0.30 Hz
GB           0
PC           1.00
    
```

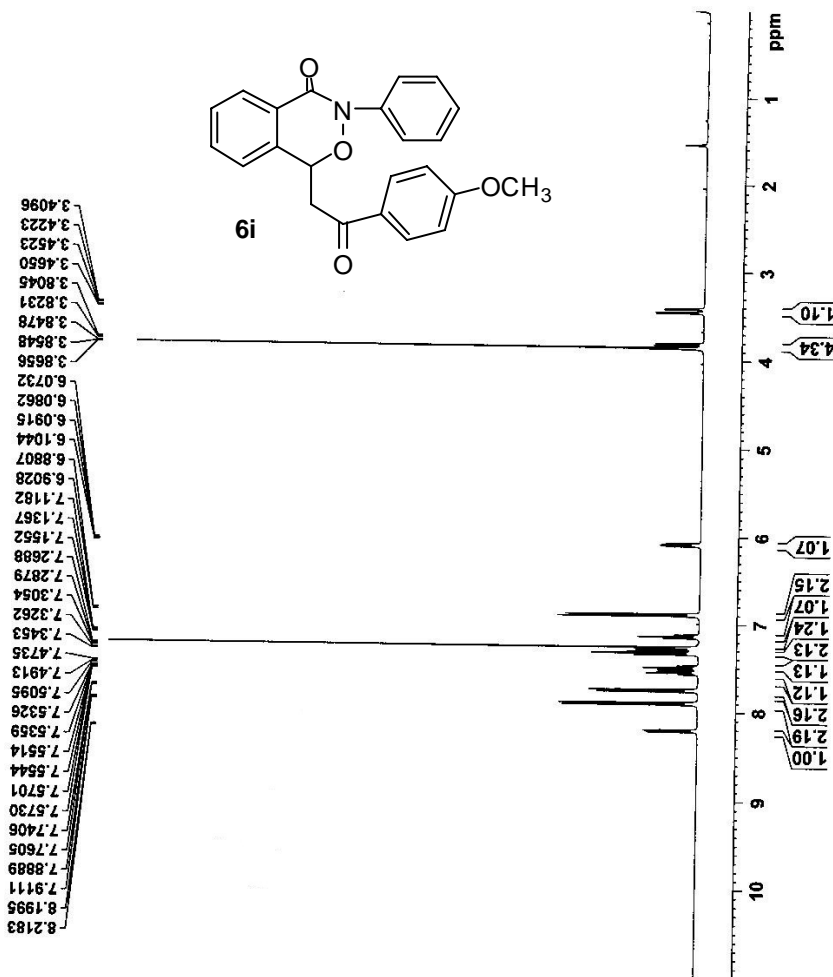



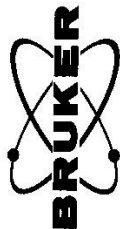

```

NAME          SXZ13-50-C13
EXPNO         1
PROCNO        1
Date_         20110415
Time_         21.48
INSTRUM       spect
PROBHD        5 mm FAPBBO BB-
PULPROG       zgpg30
TD            65536
SOLVENT       CDCl3
NS            1128
DS            4
SWH           24038.461 Hz
FIDRES        0.366798 Hz
AQ            1.3631988 sec
RG            203
DM            20.800 usec
DE            6.50 usec
TE            300.8 K
D1            2.00000000 sec
D11           0.03000000 sec
TD0           1

===== CHANNEL f1 =====
NUC1          13C
P1            8.70 usec
PL1           -2.00 dB
PL1W          57.32743073 W
SFO1          100.628253 MHz

===== CHANNEL f2 =====
CPDPRG2       waltz16
NUC2          1H
PCPD2         80.00 usec
P2            1.00 dB
PL2           14.02 dB
PL12          14.46 dB
PL13          13.16669796 W
PL2W          0.41508400 W
PL12W         0.37509048 W
PL13W         400.1716007 MHz
SFO2          400.1716007 MHz
SI            32768
SF            100.628253 MHz
WDW           EM
SSB           0
LB            1.00 Hz
GB            0
PC            1.40
    
```

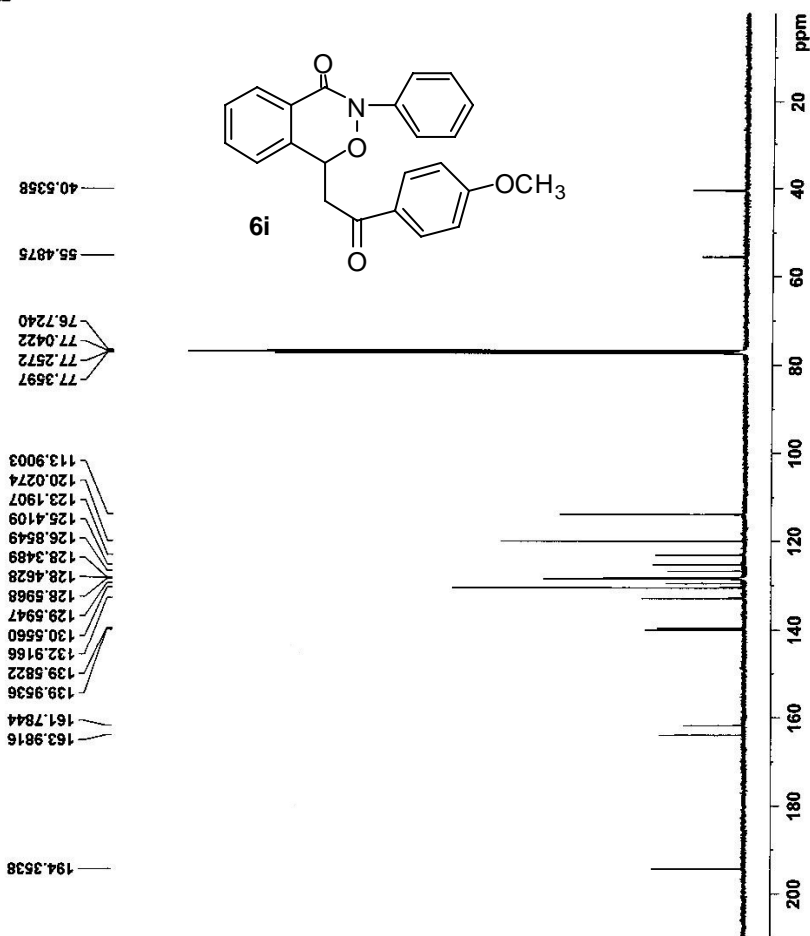

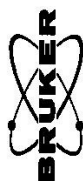

```

NAME          SZX13-89
EXPNO         1
PROCNO        1
Date_         20110518
Time          16.50
INSTRUM       spect
PROBHD        5 mm FAPBO BB-
PULPROG       zg30
TD            65536
SOLVENT       CDCl3
NS            16
DS            2
SWH           8223.685 Hz
FIDRES        0.125483 Hz
AQ            3.9846387 sec
RG            203
DW            60.800 usec
DE            6.50 usec
TE            296.2 K
D1            1.00000000 sec
TD0           1

===== CHANNEL f1 =====
NUC1          1H
P1            14.20 usec
PL1           -1.00 dB
PL12          13.18669796 W
SFO1          400.1724712 MHz
SI            32768
SF            400.1700037 MHz
WDW           EM
SSB           0
LB            0.30 Hz
GB            0
PC            1.00
    
```

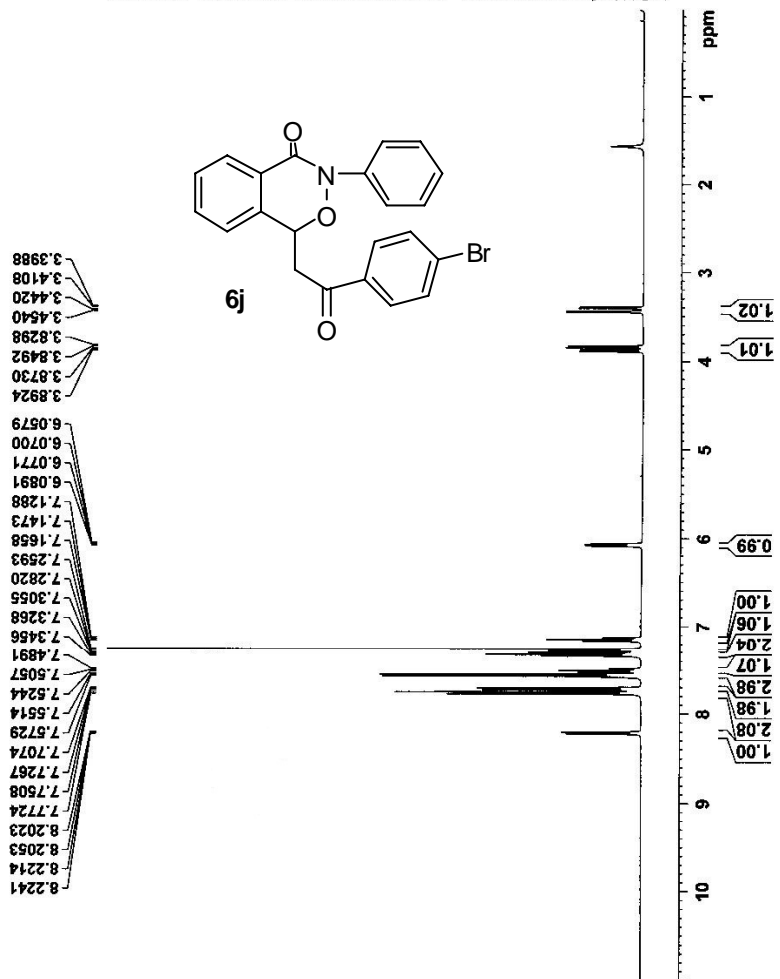

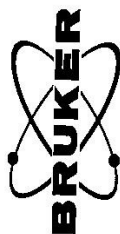

```

NAME          SX13-86-Cl3
EXPNO         1
PROCNO        1
Date_         20110519
Time          14.28
INSTRUM       spect
PROBHD        5 mm PABBO BB-
PULPROG       zgpg30
TD            65536
SOLVENT       CDCl3
NS            1210
DS            4
SWH           24038.461 Hz
FIDRES        0.366788 Hz
AQ            1.3631988 sec
RG            203
DW            20.800 usec
DE            6.50 usec
TE            297.5 K
D1            2.0000000 sec
D11           0.0300000 sec
TD0           1

=====
CHANNEL f1 =====
NUC1          13C
P1            8.70 usec
PL1           -2.00 dB
PL1W          57.32743073 W
SFO1          100.6328888 MHz

=====
CHANNEL f2 =====
CFPRG2        waltz16
NUC2          1H
PCPD2         80.00 usec
PL2           -1.00 dB
PL12          14.02 dB
PL13          14.46 dB
PL1W          13.18669796 W
PL12W         0.41508400 W
PL13W         0.37509048 W
SFO2          400.1716007 MHz
SI            32768
SF            100.628269 MHz
WDW           EM
SSB           0
LB            1.00 Hz
GB            0
PC            1.40
    
```

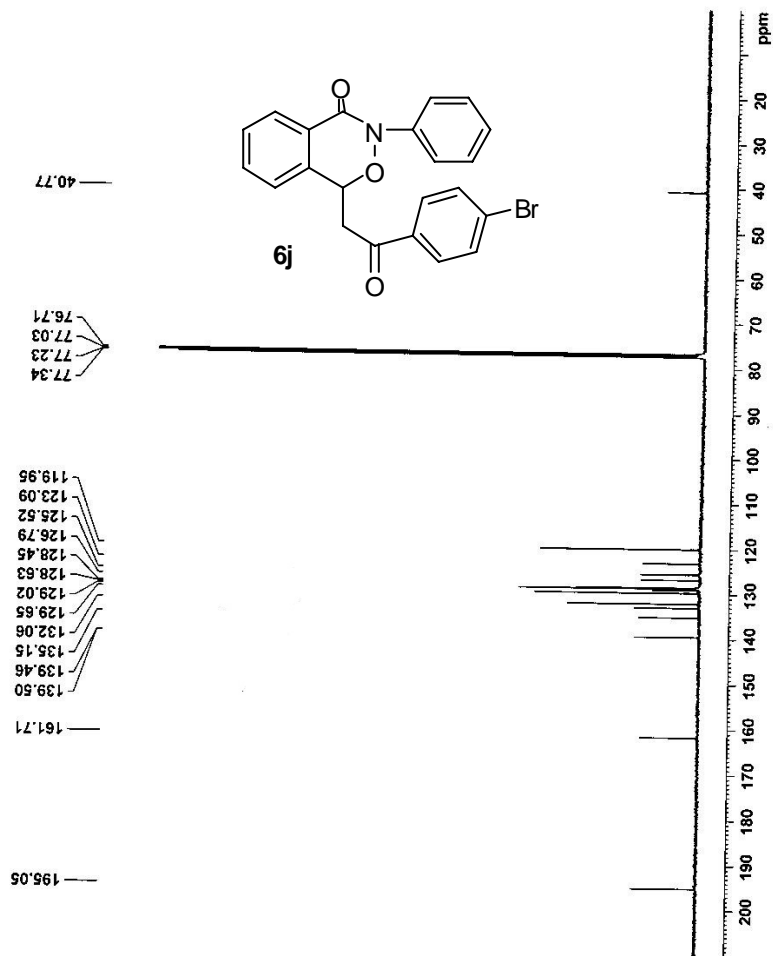

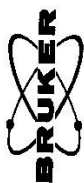

NAME SZX13-69  
EXPNO 1  
PROCNO 1  
Date\_ 20110525  
Time\_ 9.45  
INSTRUM spect  
PROBHD 5 mm PABBO BB-  
PULPROG zg30  
TD 65536  
SOLVENT CDCl3  
NS 16  
DS 2  
SWH 8223.685 Hz  
FIDRES 0.125483 Hz  
AQ 3.9846387 sec  
RG 203  
DW 60.800 usec  
DE 6.50 usec  
TE 299.0 K  
D1 1.00000000 sec  
TD0 1

===== CHANNEL f1 =====  
NUC1 1H  
P1 14.20 usec  
PL1 -1.00 dB  
PL12 13.18669796 W  
SFO1 400.1724712 MHz  
SI 32768  
SF 400.1700037 MHz  
WDW EM  
SSB 0  
LB 0.30 Hz  
GB 0  
PC 1.00

8.2532  
8.2315  
8.2163  
8.0395  
8.0175  
7.6992  
7.6792  
7.6787  
7.6067  
7.5910  
7.5880  
7.5723  
7.5692  
7.5441  
7.5254  
7.5068  
7.3301  
7.3103  
7.2592  
7.1484  
7.1298  
7.1114  
6.0968  
6.0863  
6.0769  
6.0665  
3.9924  
3.9723  
3.9491  
3.9291  
3.4958  
3.4843  
3.4525  
3.4411

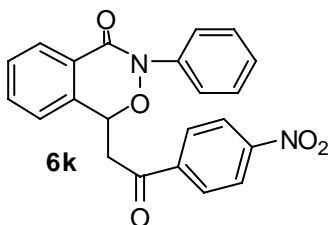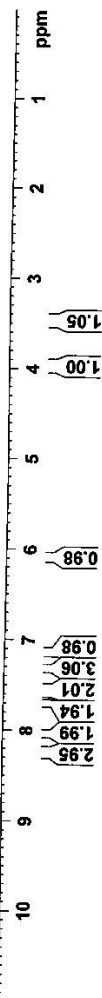

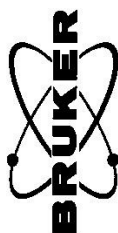

```

NAME          SXX13-69-C13
EXPNO         1
PROCNO        1
Date_         20110526
Time_         8.30
INSTRUM       spect
PROBHD        5 mm PABBO BB-
PULPROG       zgpg30
TD            65536
SOLVENT       CDCl3
NS            469
DS            4
SWH           24038.461 Hz
FIDRES        0.366798 Hz
AQ            1.3631988 sec
RG            203
DW            20.800 usec
DE            65.50 usec
TE            301.2 K
D1            2.00000000 sec
D11           0.03000000 sec
TD0           1

===== CHANNEL f1 =====
NUC1          13C
P1            8.70 usec
PL1           -9.70 dB
PL1W          57.32743073 W
SF01          100.6328688 MHz

===== CHANNEL f2 =====
CPDPRG2       waltz16
NUC2          1H
PCPD2         80.00 usec
PL2           -1.00 dB
PL12          14.02 dB
PL13          14.46 dB
PL1W          13.18669796 W
PL12W         0.41508400 W
PL13W         0.37509048 W
SF02          400.1716007 MHz
SI            32768
SF            100.6228241 MHz
WDW           EM
SSB           0
LB            1.00 Hz
GB            0
PC            1.40
    
```

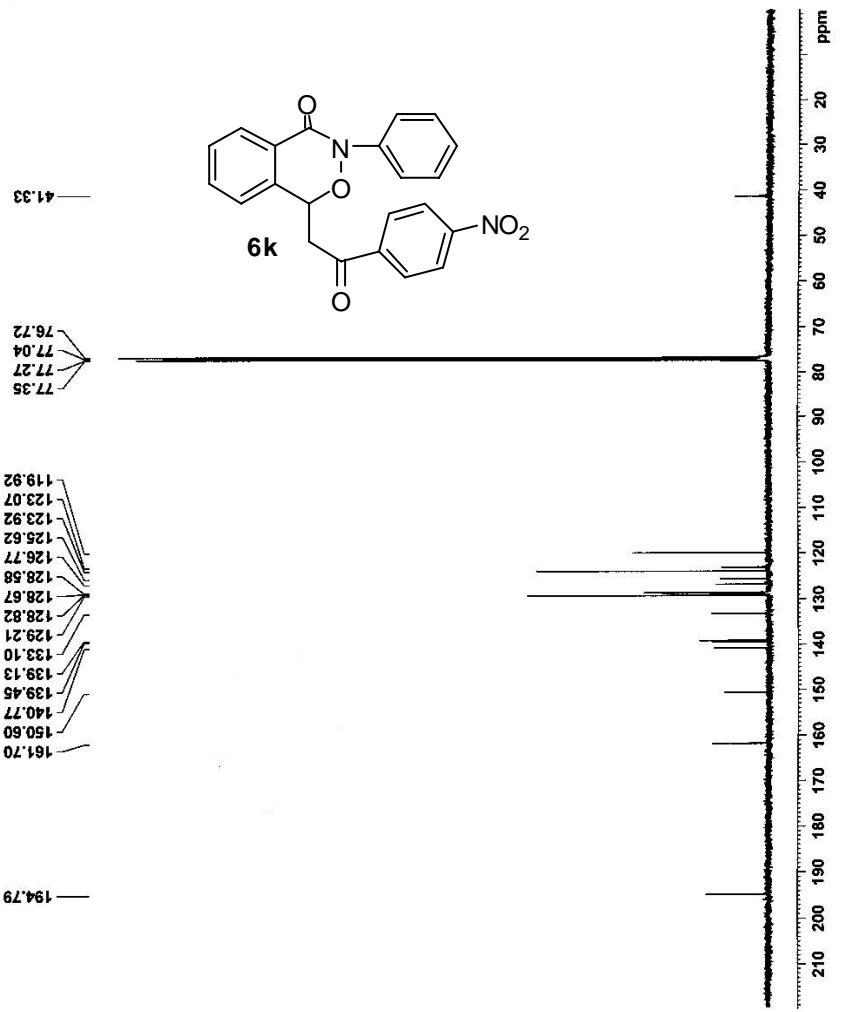

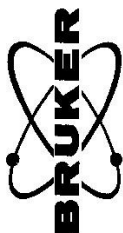

```

NAME          SZX12-89
EXPNO         1
PROCNO        1
Date_         20110314
Time_         10.00
INSTRUM       spect
PROBHD        5 mm PABBO BB
PULPROG       zgpg30
TD            65536
SOLVENT       CDCl3
NS            16
DS            2
SWH           8223.685 Hz
FIDRES       0.125483 Hz
AQ           3.9846387 sec
RG           203
DM           60.800 usec
DE           6.50 usec
TE           293.7 K
D1           1.00000000 sec
TDO          1
===== CHANNEL f1 =====
NUC1          1H
P1           14.20 usec
PL1          -1.00 dB
PL1W         13.18669796 W
SF01         400.1724712 MHz
SI           32768
SF           400.1700035 MHz
WDW          EM
SSB          0
LB           0.30 Hz
GB           0
PC           1.00
    
```

8.7825  
8.0390  
8.0191  
7.9768  
7.9585  
7.8827  
7.8626  
7.8176  
7.7980  
7.7043  
7.6391  
7.6221  
7.6043  
7.5890  
7.5854  
7.5697  
7.5552  
7.4793  
7.4597  
7.4408  
7.3822  
7.3632  
7.3423  
7.2593  
7.1856  
7.1671  
7.1486  
6.2778  
6.2646  
6.2604  
6.2471  
3.9785  
3.9599  
3.9351  
3.9165  
3.6983  
3.6858  
3.6548  
3.6423

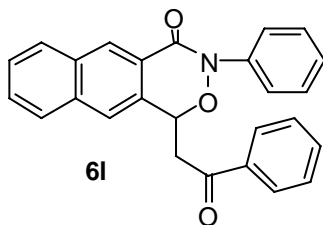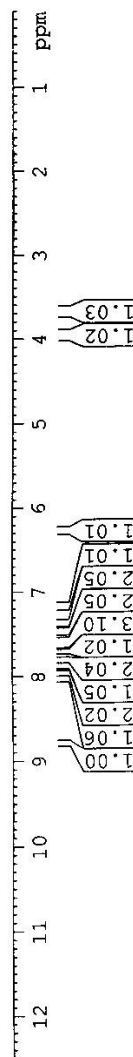

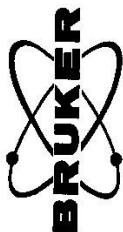

NAME SZX12-89-C13  
EXPNO 1  
PROCNO 1  
Date\_ 20110314  
Time\_ 21.33  
INSTRUM spect  
PROBHD 5 mm PABEO BB-  
PULPROG zgpg30  
TD 65536  
SOLVENT CDCl3  
NS 570  
DS 4  
SWH 24038.461 Hz  
FIDRES 0.366798 Hz  
AQ 1.3631988 sec  
RG 203  
DW 20.800 usec  
DE 6.50 usec  
TE 294.9 K  
D1 2.0000000 sec  
D11 0.0300000 sec  
TDO 1

==== CHANNEL f1 =====  
NUC1 13C  
P1 8.70 usec  
PL1 -2.00 dB  
PL1W 57.32743073 K  
SF01 100.628888 MHz

==== CHANNEL f2 =====  
CFPRG2 waitz16  
NUC2 1H  
PCPDZ 80.00 usec  
PLZ -1.00 dB  
PL12 14.02 dB  
PL13 14.46 dB  
PL2W 13.18669796 W  
PL12W 0.41508400 W  
PL13W 0.37509048 W  
SFO2 400.1716007 MHz  
SI 32768  
SF 100.6282883 MHz  
WDW EM  
SSB 0  
LB 1.00 Hz  
GB 0  
PC 1.40

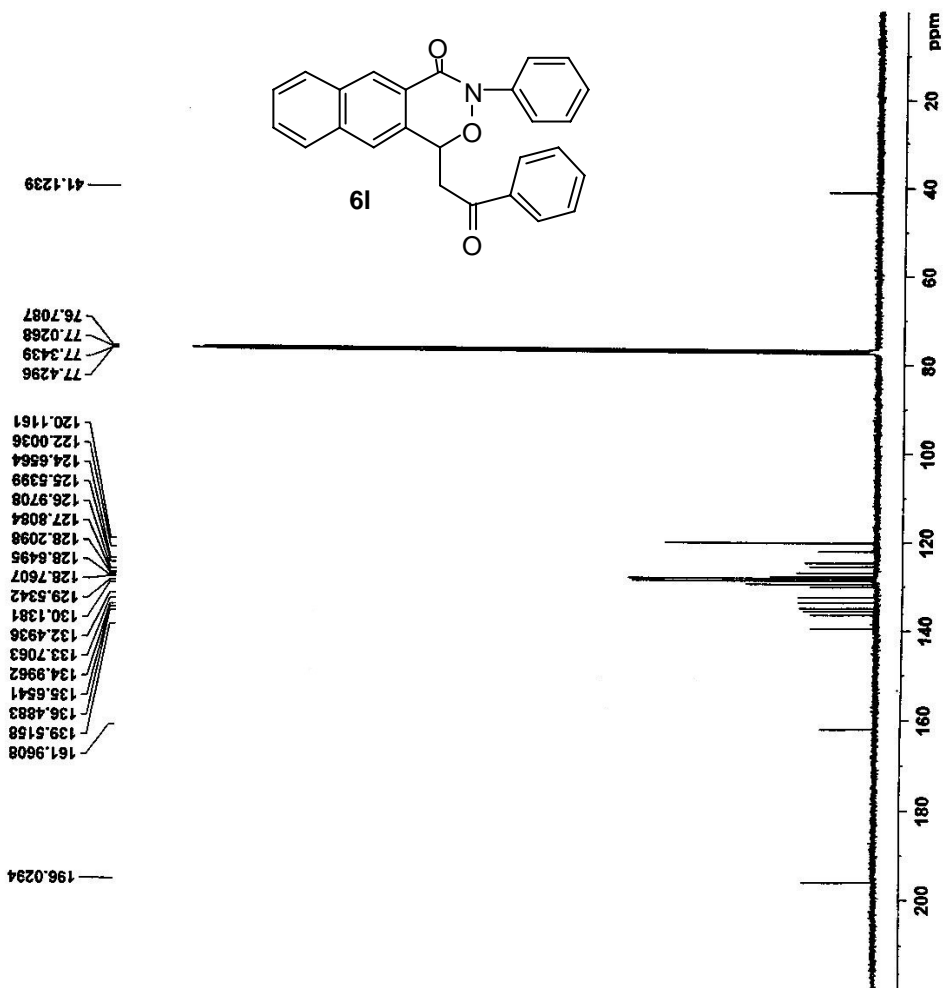

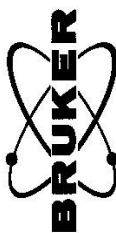

```

NAME          SX15-1.2
EXPNO        1
PROCNO       1
Date_        20111118
Time         9.25
INSTRUM      spect
PROBHD       5 mm PABBO BB-
PULPROG      zg30
TD           65536
SOLVENT      CDCl3
NS           16
DS           1
SWH          8223.685 Hz
FIDRES       0.123483 Hz
AQ           3.9846387 sec
RG           181
DW           60.800 usec
DE           6.50 usec
TE           296.3 K
D1           1.00000000 sec
TD0          1

===== CHANNEL f1 =====
NUC1         1H
PI           13.80 usec
PL1         -1.00 dB
PL1W        13.18669796 W
SFO1         400.1724712 MHz
SI           32768
SF           400.1700040 MHz
WDW          EM
SSB          0
LB           0.30 Hz
GB           0
PC           1.00
    
```

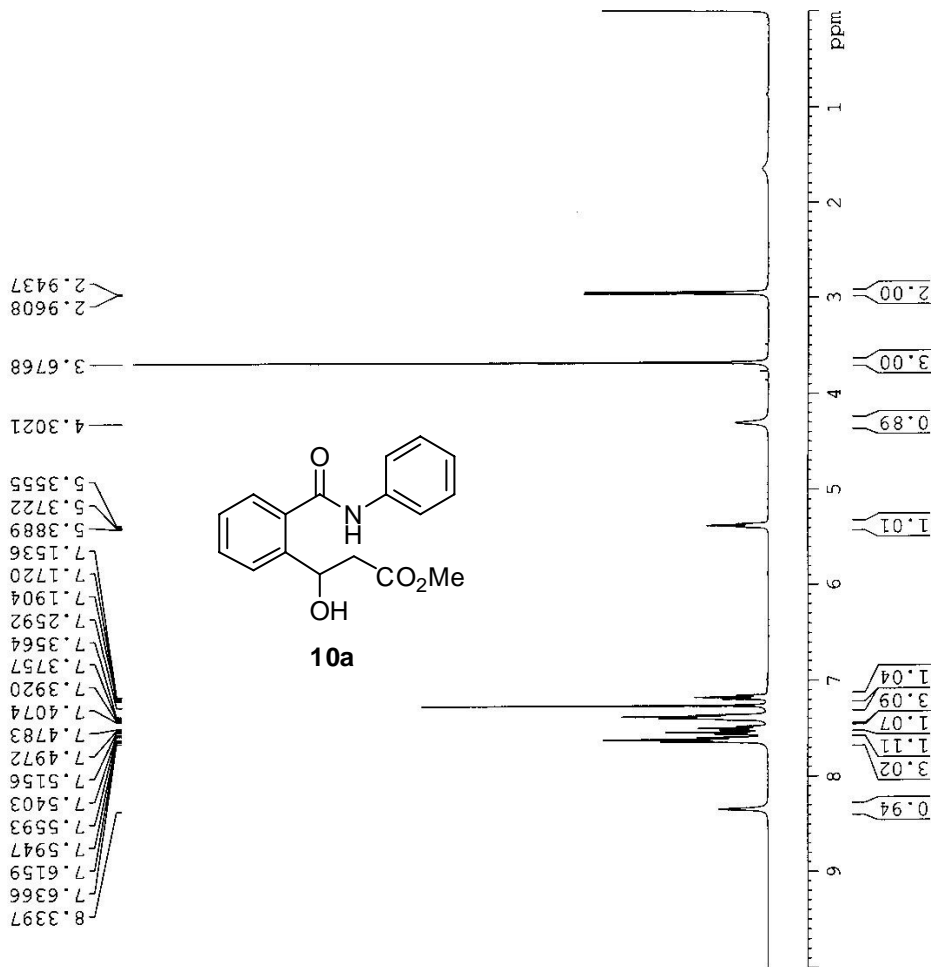



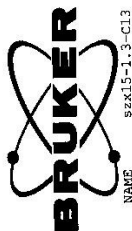

```

NAME          szzx15-1.3-cl3
EXPNO         1
PROCNO        1
Date_         20111123
Time_         16.16
INSTRUM       spect
PROBHD        5 mm PABBO BB-
PULPROG       zgpg30
TD            65536
SOLVENT       CDCl3
NS            150
DS            4
SWH           24038.461 Hz
FIDRES        0.366798 Hz
AQ            1.3631888 sec
RG            203
DW            20.800 usec
DE            6.50 usec
TE            296.8 K
D1            2.0000000 sec
d11           0.0300000 sec
TD0           1
===== CHANNEL f1 =====
NUC1          13C
P1            8.50 usec
PL1           -2.00 dB
PL1W          57.32743073 W
SF01          100.628888 MHz
===== CHANNEL f2 =====
CPDPRG2       waltz16
NUC2          1H
PCPD2         80.00 usec
PL2           -1.00 dB
PL2W          14.26 dB
PL12         14.46 dB
PL13         14.46 dB
PL2W         13.18669736 W
PL12W        0.39276794 W
PL13W        0.37509088 W
SF02          400.176088 MHz
SI            31
SFO2          100.6226250 MHz
SSB           0
GB            0
PC            1.40
    
```

172.56  
 168.29  
 140.61  
 137.97  
 135.29  
 130.96  
 128.99  
 128.05  
 127.25  
 124.73  
 120.47  
 77.54  
 77.22  
 76.90  
 68.30  
 51.86  
 41.44

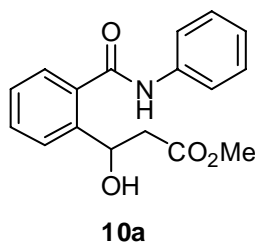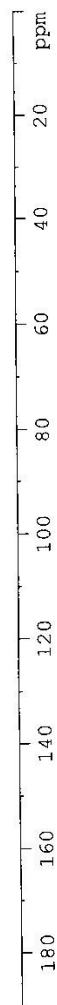

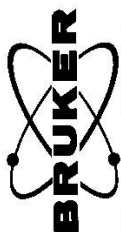

NAME SZX15-2.2  
 EXPNO 1  
 PROCNO 1  
 Date\_ 20111121  
 Time\_ 10.49  
 INSTRUM spect  
 PROBHD 5 mm PABBO BB-  
 PULPROG zg30  
 TD 65436  
 SOLVENT CDCl3  
 NS 16  
 DS 2  
 SWH 8223.685 Hz  
 FIDRES 0.175463 Hz  
 AQ 3.9846367 sec  
 RG 161  
 DW 60.500 usec  
 DE 6.50 usec  
 TE 293.5 K  
 D1 1.00000000 sec  
 TD0 1  
 ===== CHANNEL f1 =====  
 NUC1 1H  
 P1 13.80 usec  
 PL1 -1.00 dB  
 PL1W 13.18669796 W  
 SF01 400.1724712 MHz  
 SI 32768  
 SF 400.1700036 MHz  
 EM  
 WDW 0  
 SSB 0  
 LB 0.30 Hz  
 GB 0  
 PC 1.00

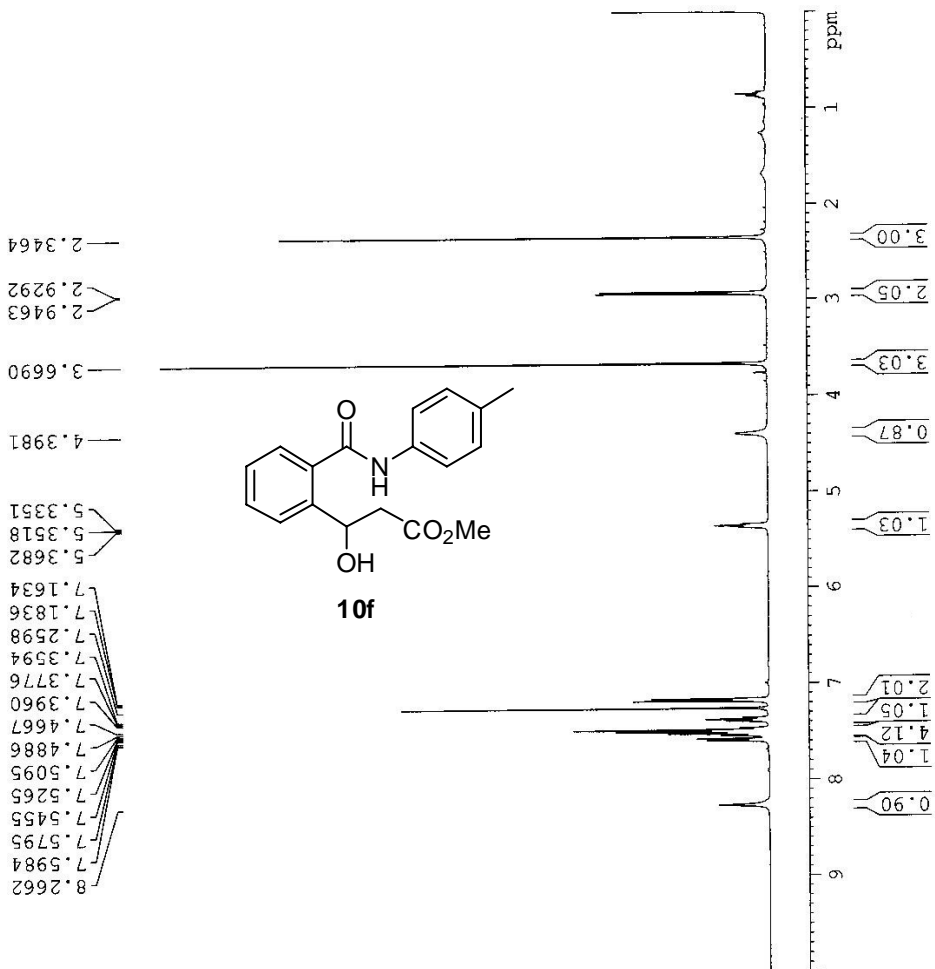

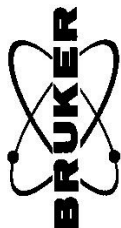

NAME SZX15-2-c13  
EXPNO 1  
PROCNO 1  
Date\_ 20111121  
Time 20.19  
INSTRUM spect  
PROBHD 5 mm PABBO BB-  
PULPROG zgpg30  
TD 65536  
SOLVENT CDCl3  
NS 2982  
DS 4  
SWH 24038.461 Hz  
FIDRES 0.36698 Hz  
AQ 1.561928 sec  
RG 203  
DE 20.800 usec  
TE 6.50 usec  
DE 297.9 K  
D1 2.00000000 sec  
D11 0.03000000 sec  
TDO 1

===== CHANNEL f1 =====  
NUC1 13C  
P1 8.150 usec  
PL1 -2.00 dB  
SFO1 57.32743073 MHz  
100.6328888 MHz

===== CHANNEL f2 =====  
CFDPRG2 waltz16  
NUC2 1H  
PCPD2 80.00 usec  
PL2 1.00 dB  
PL12 14.46 dB  
PL13 14.46 dB  
PL12W 13.18669796 W  
PL12W 0.33276794 W  
PL13W 0.37509048 W  
SFO2 400.1716007 MHz  
SI 32768  
SF 100.6228248 MHz  
EM  
WDW 0  
SSB 0  
LB 1.00 Hz  
GC  
PC 1.40

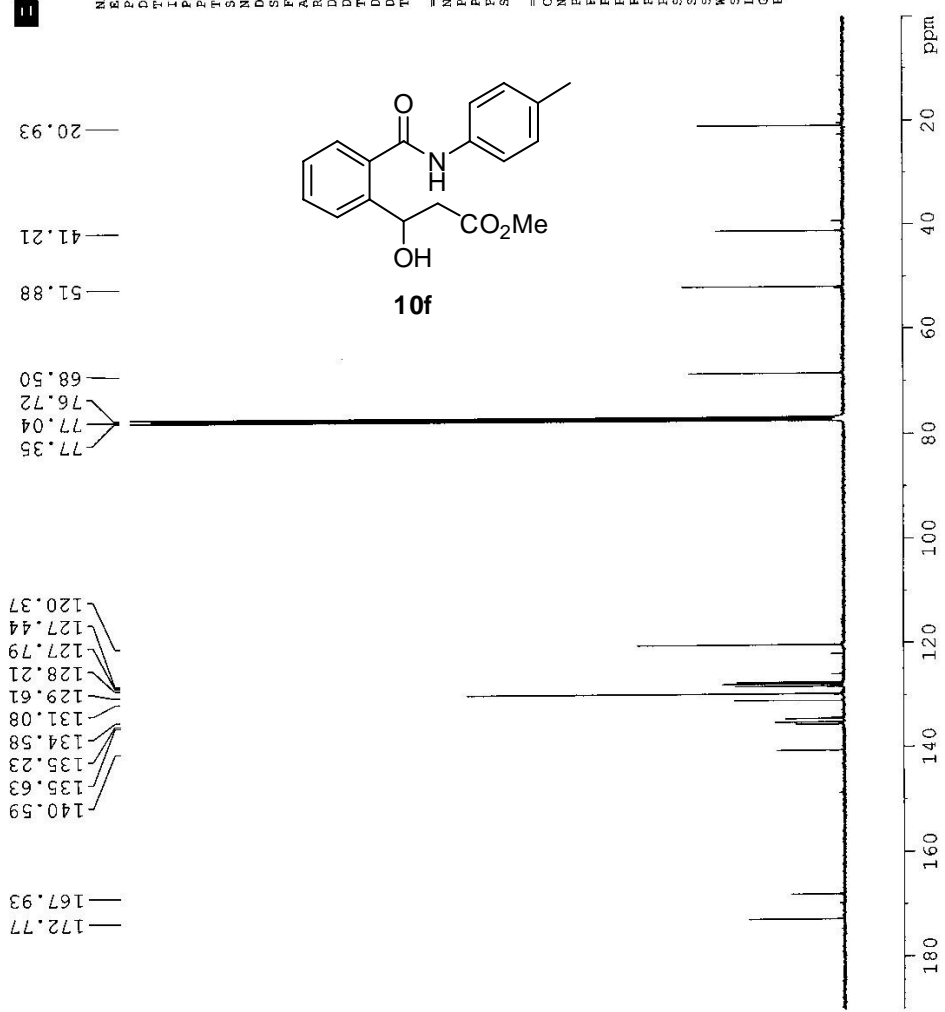

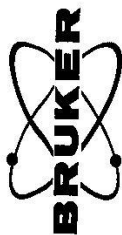

```

NAME          szx14-24-1
EXPNO         1
PROCNO        1
Date_         20111017
Time_         9:27
INSTRUM       spect
PROBHD        5 mm PABBO BB-
PULPROG       zg30
TD            65536
SOLVENT       CDCl3
NS            16
DS            2
SWH           8223.685 Hz
FIDRES        0.125483 Hz
AQ            3.9846387 sec
RG            203
DW            60.800 usec
DE            6.50 usec
TE            298.0 K
D1            1.00000000 sec
TD0           1

===== CHANNEL f1 =====
NUC1          1H
P1            13.80 usec
PL1           -1.00 dB
PL1W          13.186669796 W
SFO1          400.1724712 MHz
SI            32768
SF            400.1700298 MHz
WDW           EM
SSB           0
LB            0.30 Hz
GB            0
PC            1.00
    
```

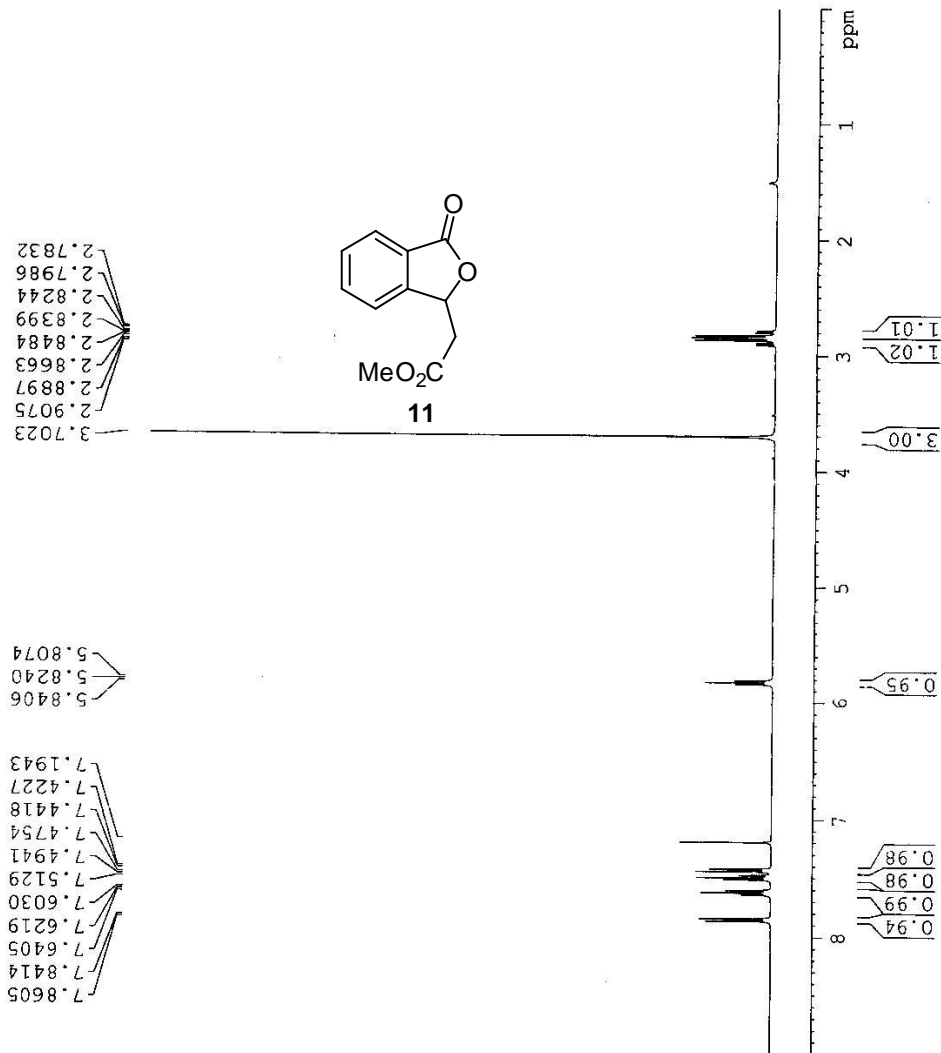

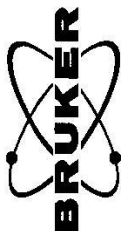

NAME SZX14-24-C13  
 EXNO 2  
 PROCNO 1  
 Date\_ 20110930  
 Time\_ 21.49  
 INSTRUM spect  
 PROBHD 5 mm PABBO BB-  
 PULPROG zgpg30  
 TD 65536  
 SOLVENT CDCl3  
 NS 347  
 DS 4  
 SWH 24038.461 Hz  
 FIDRES 0.366798 Hz  
 AQ 1.3631988 sec  
 RG 203  
 DW 20.800 usec  
 DE 6.50 usec  
 TE 297.2 K  
 D1 2.0000000 sec  
 D11 0.0300000 sec  
 D12 0.0300000 sec  
 D13 0.0300000 sec  
 D14 0.0300000 sec  
 D15 0.0300000 sec  
 D16 0.0300000 sec  
 D17 0.0300000 sec  
 D18 0.0300000 sec  
 D19 0.0300000 sec  
 D20 0.0300000 sec  
 D21 0.0300000 sec  
 D22 0.0300000 sec  
 D23 0.0300000 sec  
 D24 0.0300000 sec  
 D25 0.0300000 sec  
 D26 0.0300000 sec  
 D27 0.0300000 sec  
 D28 0.0300000 sec  
 D29 0.0300000 sec  
 D30 0.0300000 sec  
 D31 0.0300000 sec  
 D32 0.0300000 sec  
 D33 0.0300000 sec  
 D34 0.0300000 sec  
 D35 0.0300000 sec  
 D36 0.0300000 sec  
 D37 0.0300000 sec  
 D38 0.0300000 sec  
 D39 0.0300000 sec  
 D40 0.0300000 sec  
 D41 0.0300000 sec  
 D42 0.0300000 sec  
 D43 0.0300000 sec  
 D44 0.0300000 sec  
 D45 0.0300000 sec  
 D46 0.0300000 sec  
 D47 0.0300000 sec  
 D48 0.0300000 sec  
 D49 0.0300000 sec  
 D50 0.0300000 sec  
 D51 0.0300000 sec  
 D52 0.0300000 sec  
 D53 0.0300000 sec  
 D54 0.0300000 sec  
 D55 0.0300000 sec  
 D56 0.0300000 sec  
 D57 0.0300000 sec  
 D58 0.0300000 sec  
 D59 0.0300000 sec  
 D60 0.0300000 sec  
 D61 0.0300000 sec  
 D62 0.0300000 sec  
 D63 0.0300000 sec  
 D64 0.0300000 sec  
 D65 0.0300000 sec  
 D66 0.0300000 sec  
 D67 0.0300000 sec  
 D68 0.0300000 sec  
 D69 0.0300000 sec  
 D70 0.0300000 sec  
 D71 0.0300000 sec  
 D72 0.0300000 sec  
 D73 0.0300000 sec  
 D74 0.0300000 sec  
 D75 0.0300000 sec  
 D76 0.0300000 sec  
 D77 0.0300000 sec  
 D78 0.0300000 sec  
 D79 0.0300000 sec  
 D80 0.0300000 sec  
 D81 0.0300000 sec  
 D82 0.0300000 sec  
 D83 0.0300000 sec  
 D84 0.0300000 sec  
 D85 0.0300000 sec  
 D86 0.0300000 sec  
 D87 0.0300000 sec  
 D88 0.0300000 sec  
 D89 0.0300000 sec  
 D90 0.0300000 sec  
 D91 0.0300000 sec  
 D92 0.0300000 sec  
 D93 0.0300000 sec  
 D94 0.0300000 sec  
 D95 0.0300000 sec  
 D96 0.0300000 sec  
 D97 0.0300000 sec  
 D98 0.0300000 sec  
 D99 0.0300000 sec  
 D100 0.0300000 sec  
 CHANNEL f1 13C  
 FI 8.50 usec  
 PL1 -2.00 dB  
 PL1W 57.32743073 W  
 SFO1 100.6328888 MHz  
 CHANNEL f2 waltz16  
 CPDPRG2  
 NUC2 1H  
 PCPD2 80.00 usec  
 PL2 -1.00 dB  
 PL12 14.26 dB  
 PL13 14.46 dB  
 PL14 13.18665796 W  
 PL15 0.39276794 W  
 PL16 0.37509048 W  
 PL17 400.1716007 MHz  
 SFO2 32768  
 SF 100.6228230 MHz  
 EM 0  
 WDW 0  
 SSB 0  
 LB 1.00 Hz  
 GB 0  
 PC 1.40

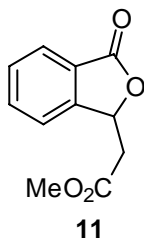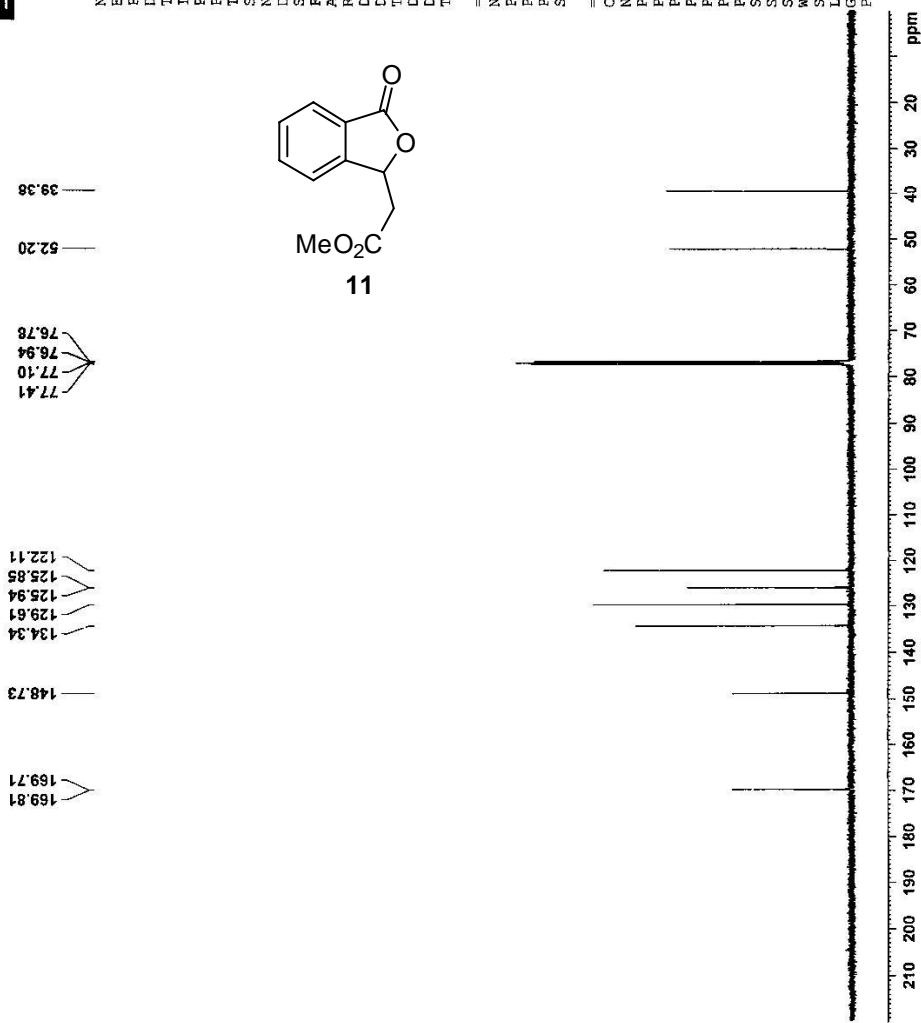

Supplement: c2ob25137j.pdf [file c2ob25137j.pdf]
